# Supplementary material
Source: PubMed Central journal article supplement (PMC5039764)
Supplement: ci6b00122_si_001.pdf [file ci6b00122_si_001.pdf]

# Supporting Information: Figures

## AN UNPRECEDENTEDLY LARGE-SCALE KINASE INHIBITOR SET ENABLING THE ACCURATE PREDICTION OF COMPOUND-KINASE ACTIVITIES: A WAY TOWARDS SELECTIVE PROMISCUITY BY DESIGN?

*Serge Christmann-Franck<sup>\*†§</sup>, Gerard J.P. van Westen<sup>‡#</sup>, George Papadatos<sup>‡</sup>, Fanny Beltran Escudie<sup>†&</sup>, Alexander Roberts<sup>†¥</sup>, John P. Overington<sup>‡%</sup>, Daniel Domine<sup>†@</sup>*

<sup>†</sup> Merck Serono, Chemin des Mines 9, 1202 Genève, Switzerland

<sup>‡</sup> European Molecular Biology Laboratory, European Bioinformatics Institute (EMBL-EBI), Wellcome Genome Campus, Hinxton, Cambridgeshire CB10 1SD, UK

### Corresponding Author

\* serge.christmann-franck@hotmail.fr

### Present Addresses:

<sup>§</sup> Novartis Institutes for Biomedical Research, Postfach, CH-4002, Basel, Switzerland

<sup>#</sup> Medicinal Chemistry, Leiden Academic Center for Drug Research, Leiden University, Einsteinweg 55, 2333CC, Leiden, The Netherlands

<sup>&</sup> Medicines for Malaria Venture, Route de Pré-Bois 20, 1215 Meyrin, Switzerland

<sup>¥</sup> EMD Serono, 45 Middlesex Turnpike, Billerica, MA 01821, USA

<sup>%</sup> Stratified Medical, 40 Churchway, London, NW1 1LM, UK

<sup>@</sup> WegA Informatik AG, Aeschengraben 20, 4051 Basel, Switzerland

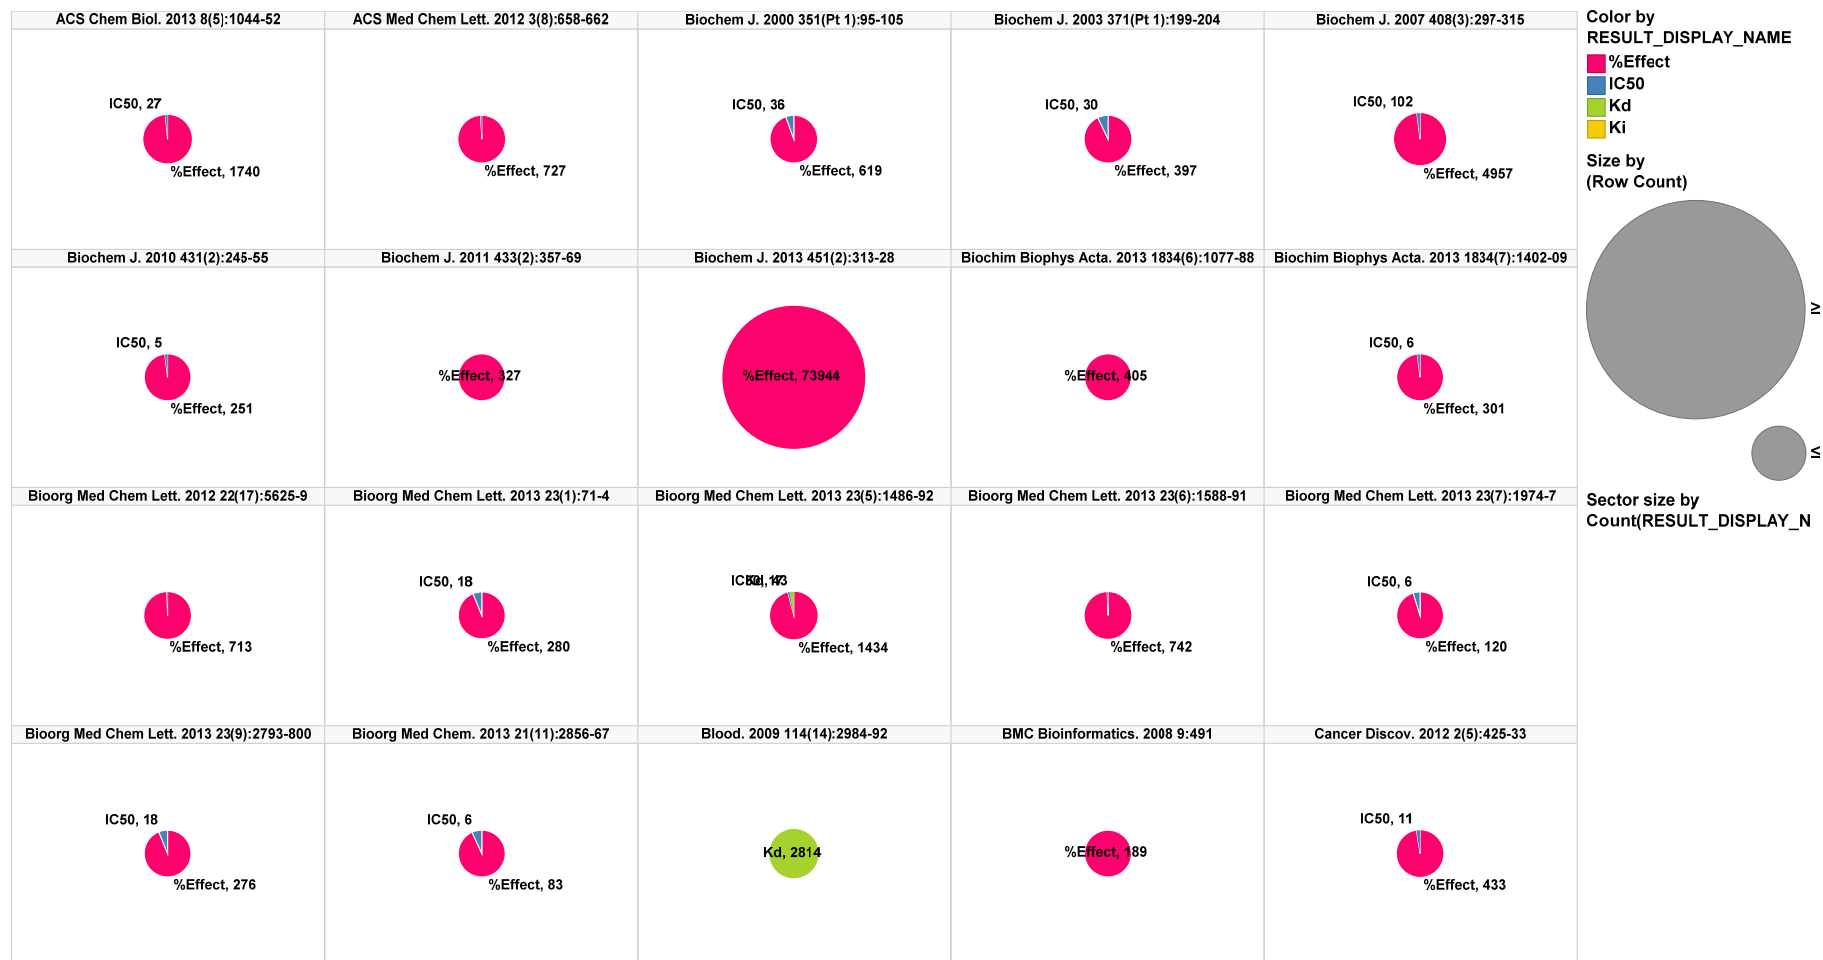

Figure S1. Comparison across the data sources of the relative numbers of measurements and of their distribution according to the results types

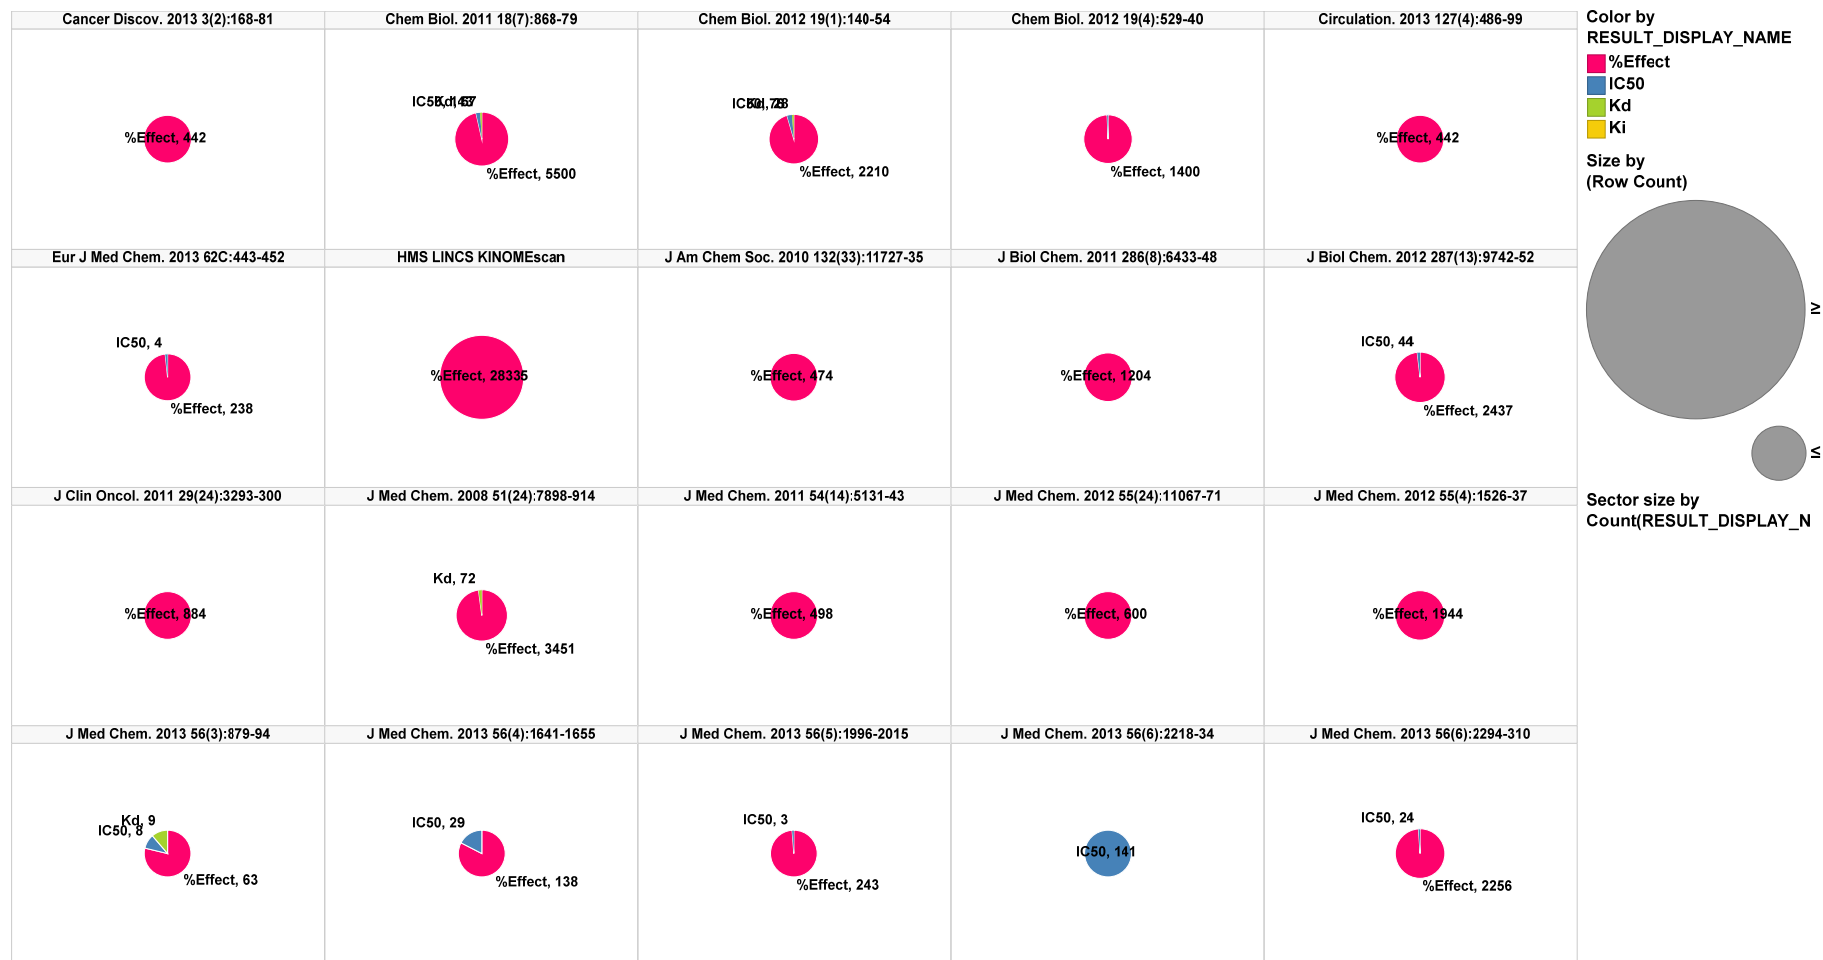

Figure S1. Comparison across the data sources of the relative numbers of measurements and of their distribution according to the results types

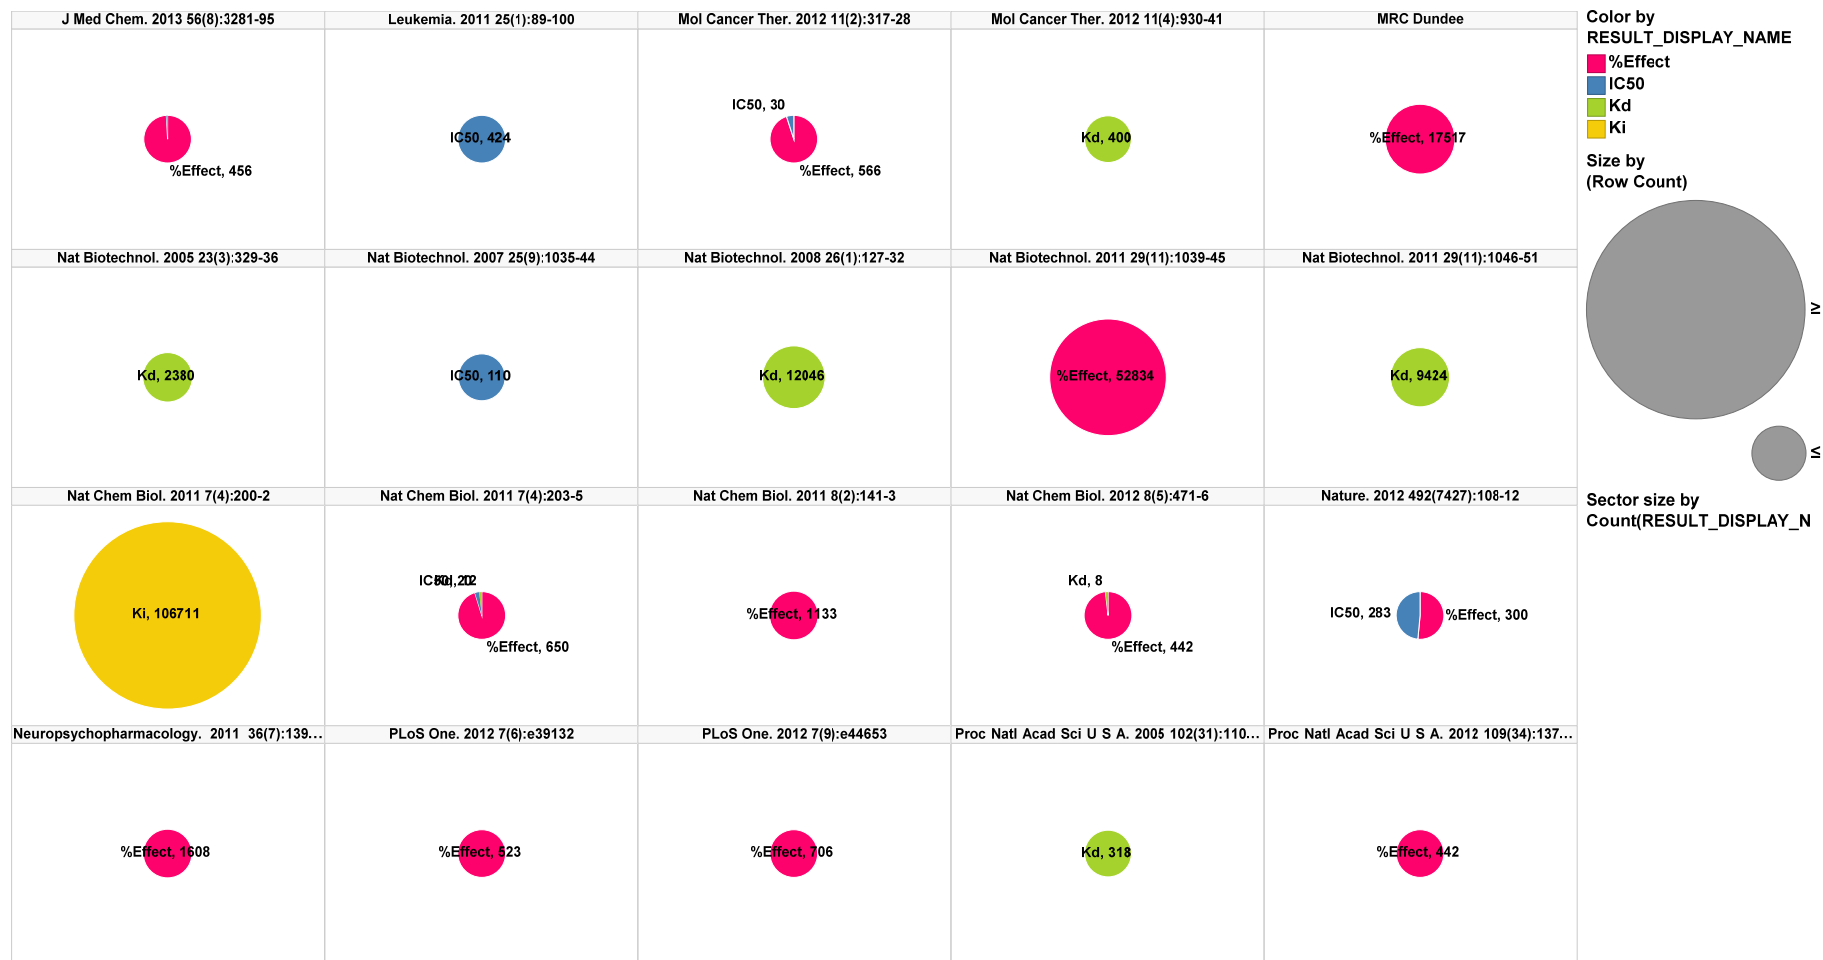

Figure S1. Comparison across the data sources of the relative numbers of measurements and of their distribution according to the results types

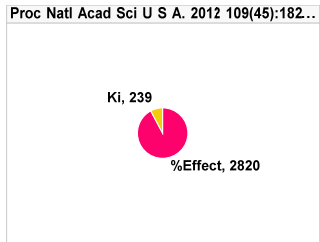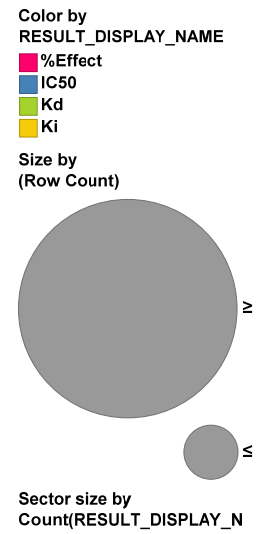

Figure S1. Comparison across the data sources of the relative numbers of measurements and of their distribution according to the results types

Figure S2. (high resolution version of Fig 3). Coverage of the kinome by the current dataset; the kinase names and circles sizes are proportional to the number of corresponding compounds. The picture was generated using the Kinome Render<sup>4</sup> and the kinome tree illustration is reproduced courtesy of Cell Signaling Technology, Inc. ([www.cellsignal.com](http://www.cellsignal.com))



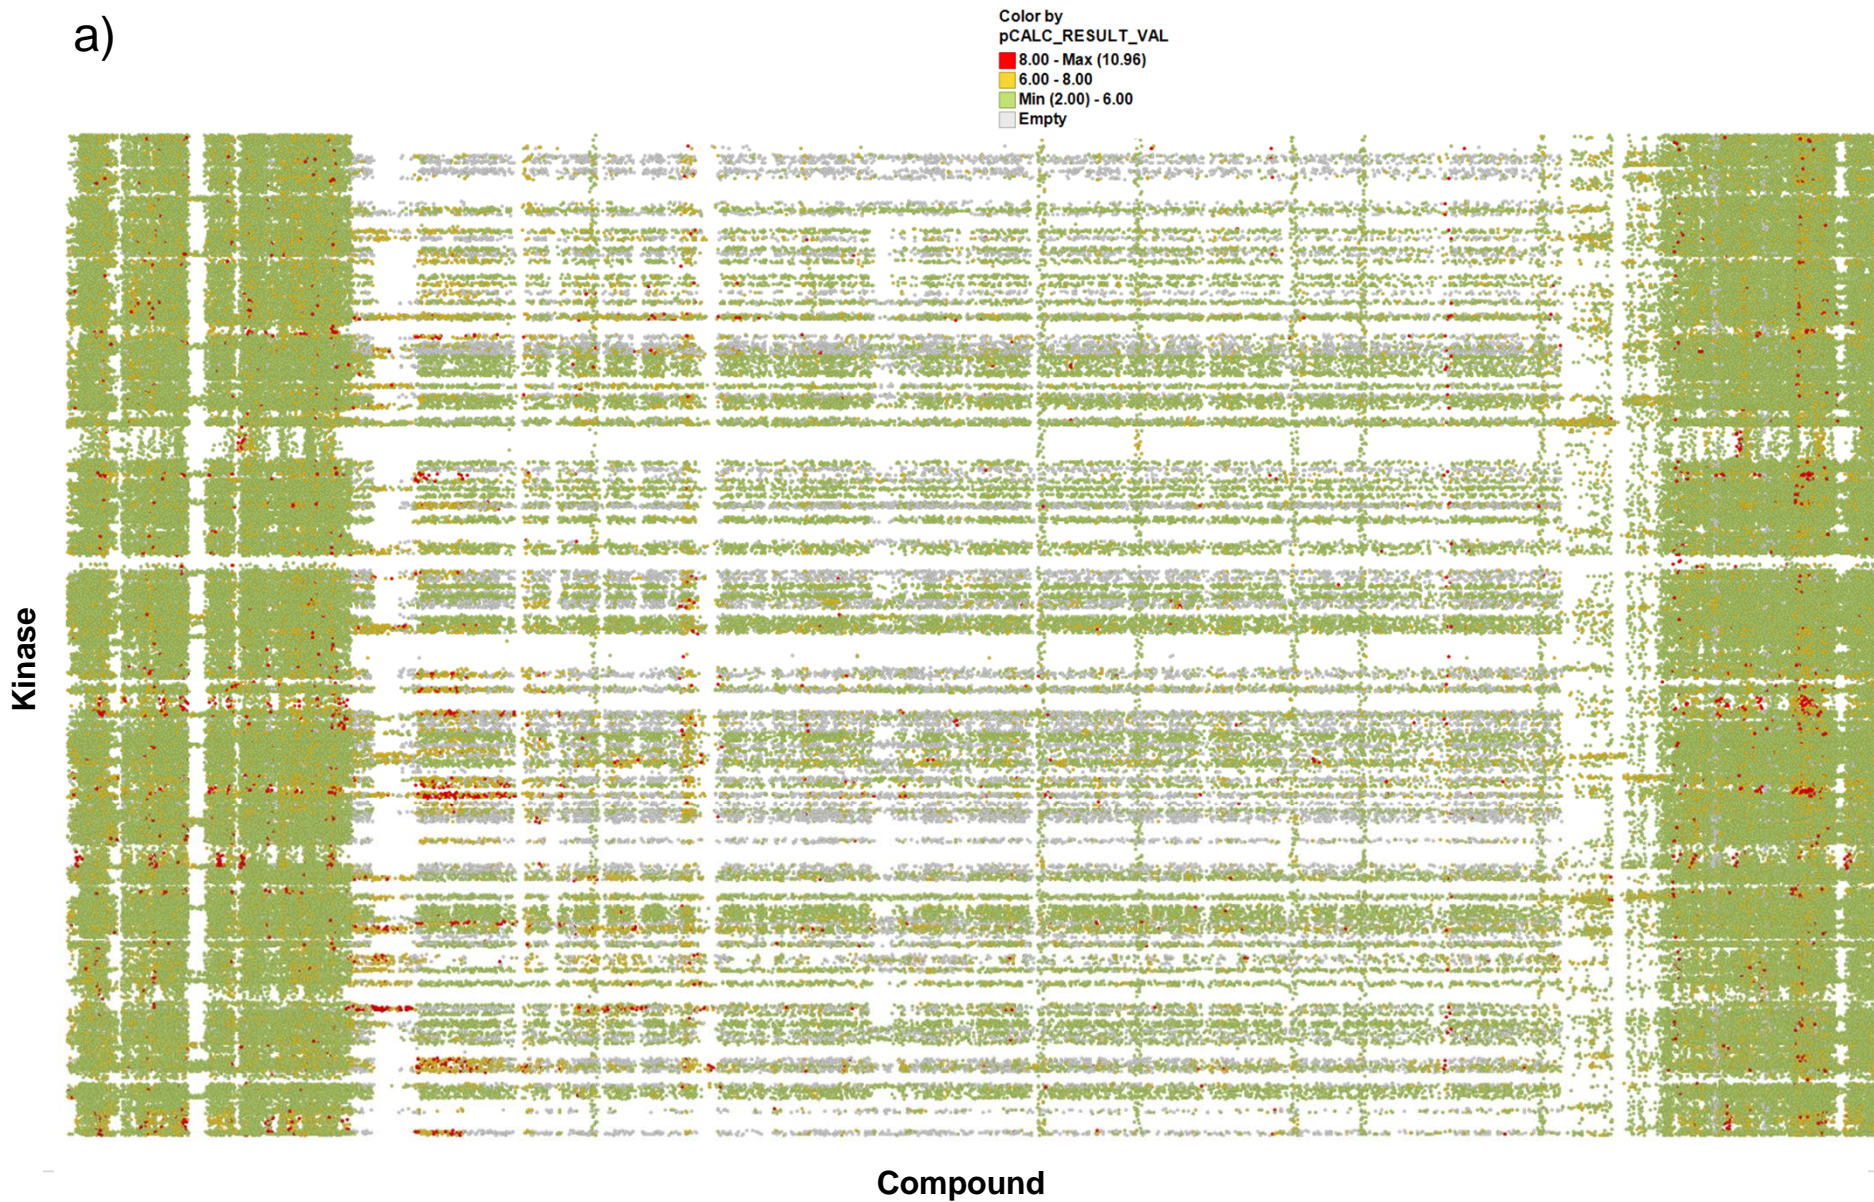

Figure S3. Coverage across data sources, at the Kinase level: (a) complete dataset



b)

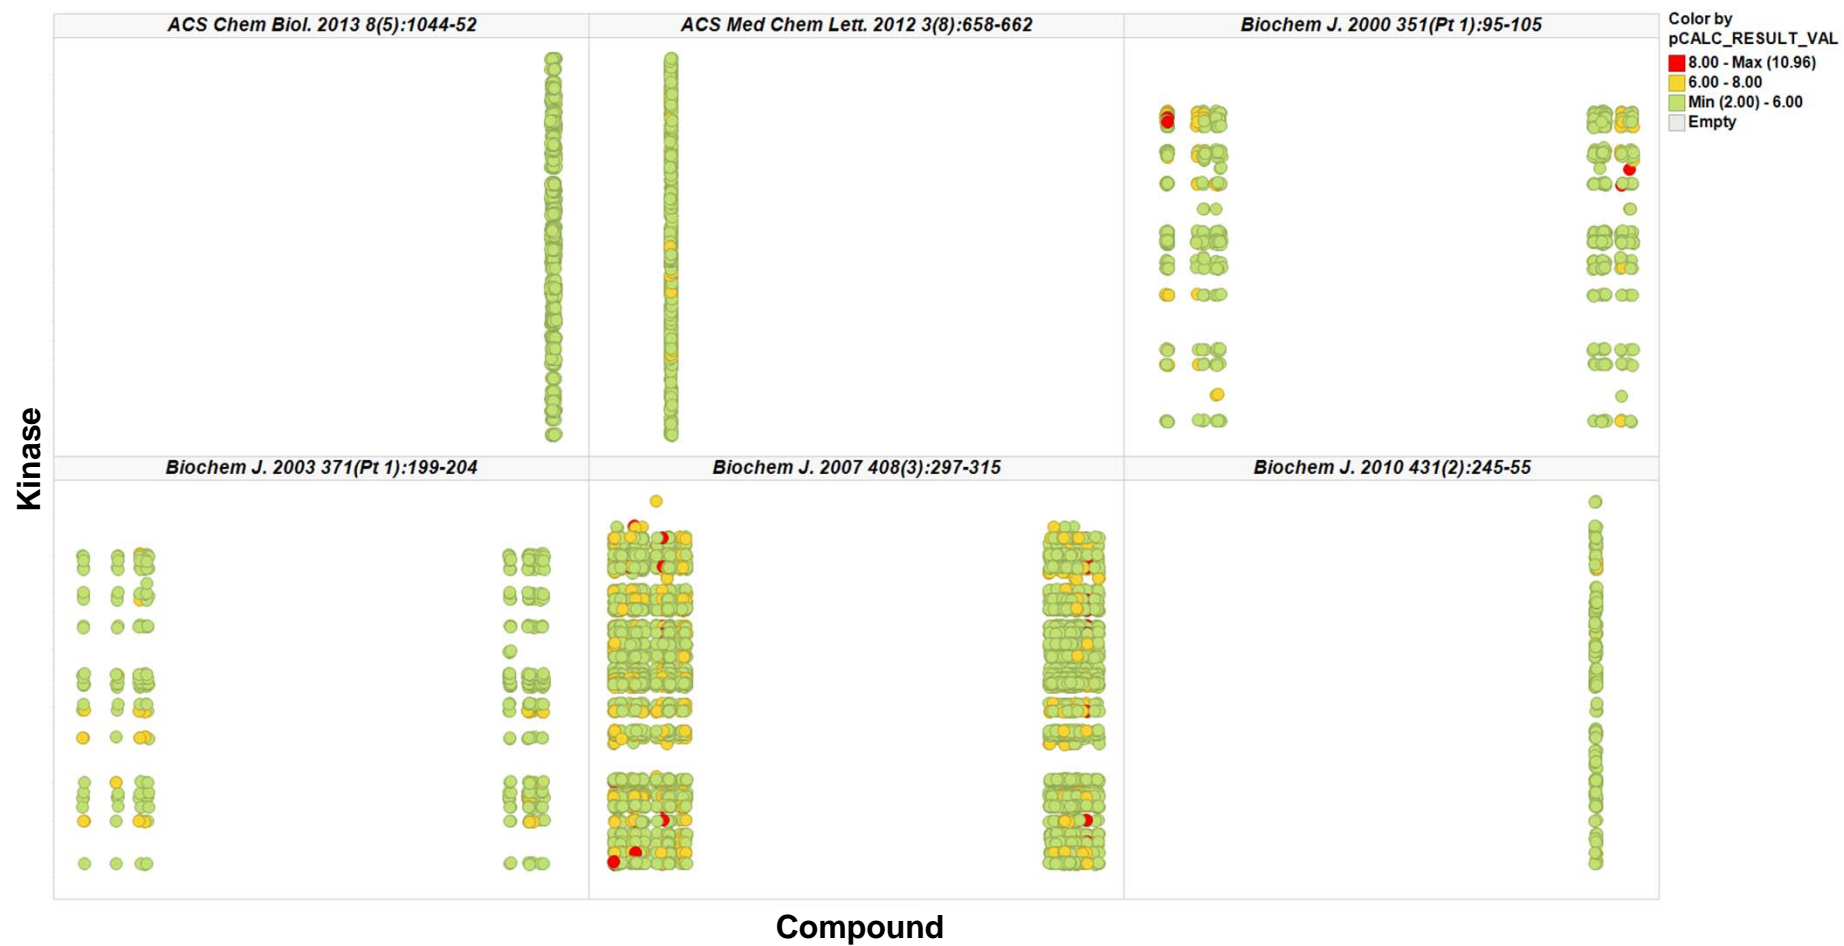

Figure S3. Coverage across data sources, at the Kinase level: (b) per data source

b)

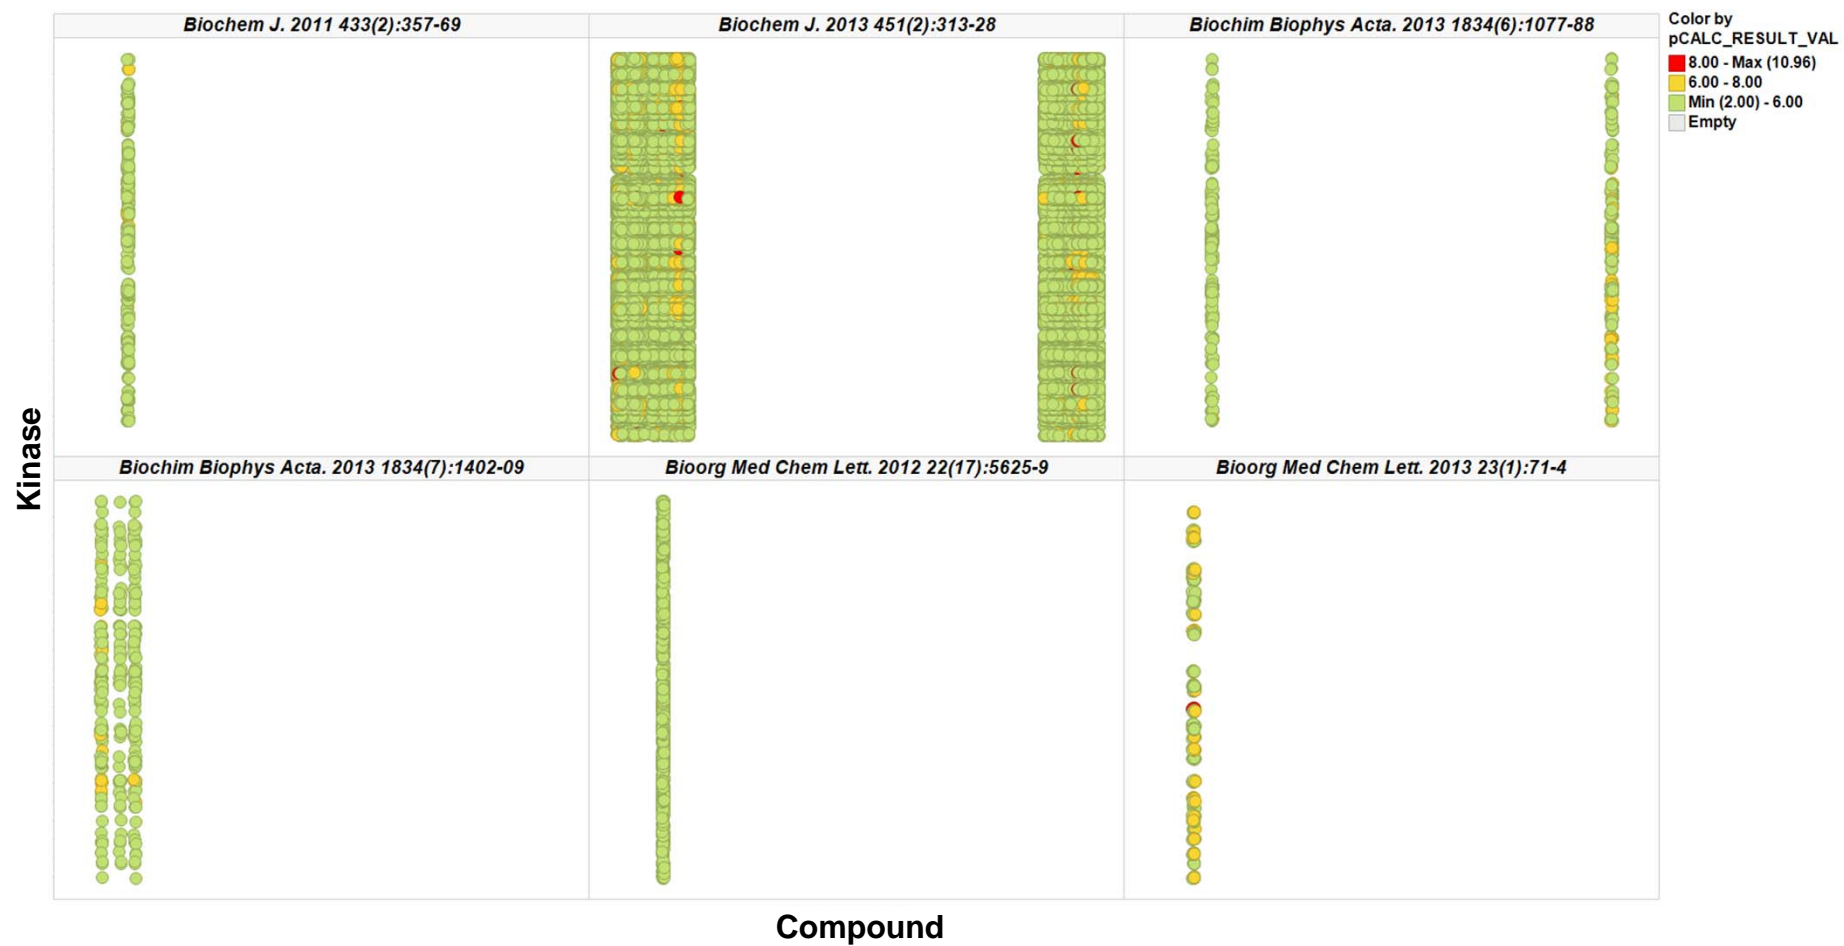

Figure S3. Coverage across data sources, at the Kinase level: (b) per data source

b)

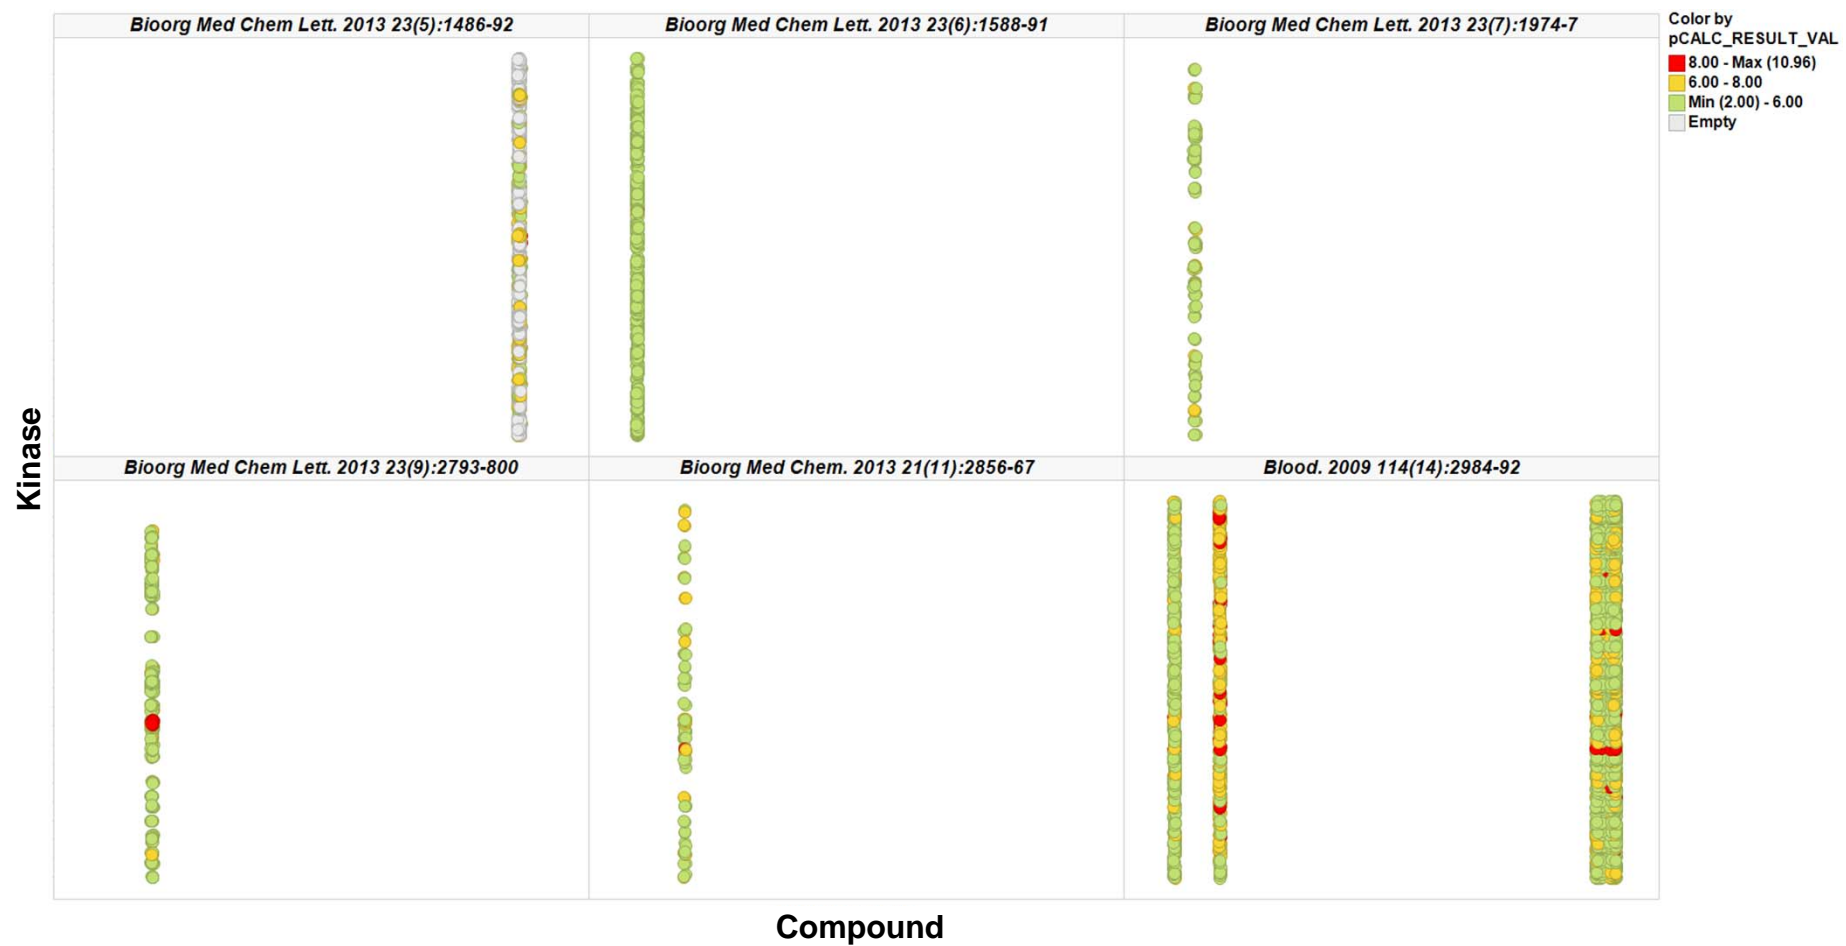

Figure S3. Coverage across data sources, at the Kinase level: (b) per data source

b)

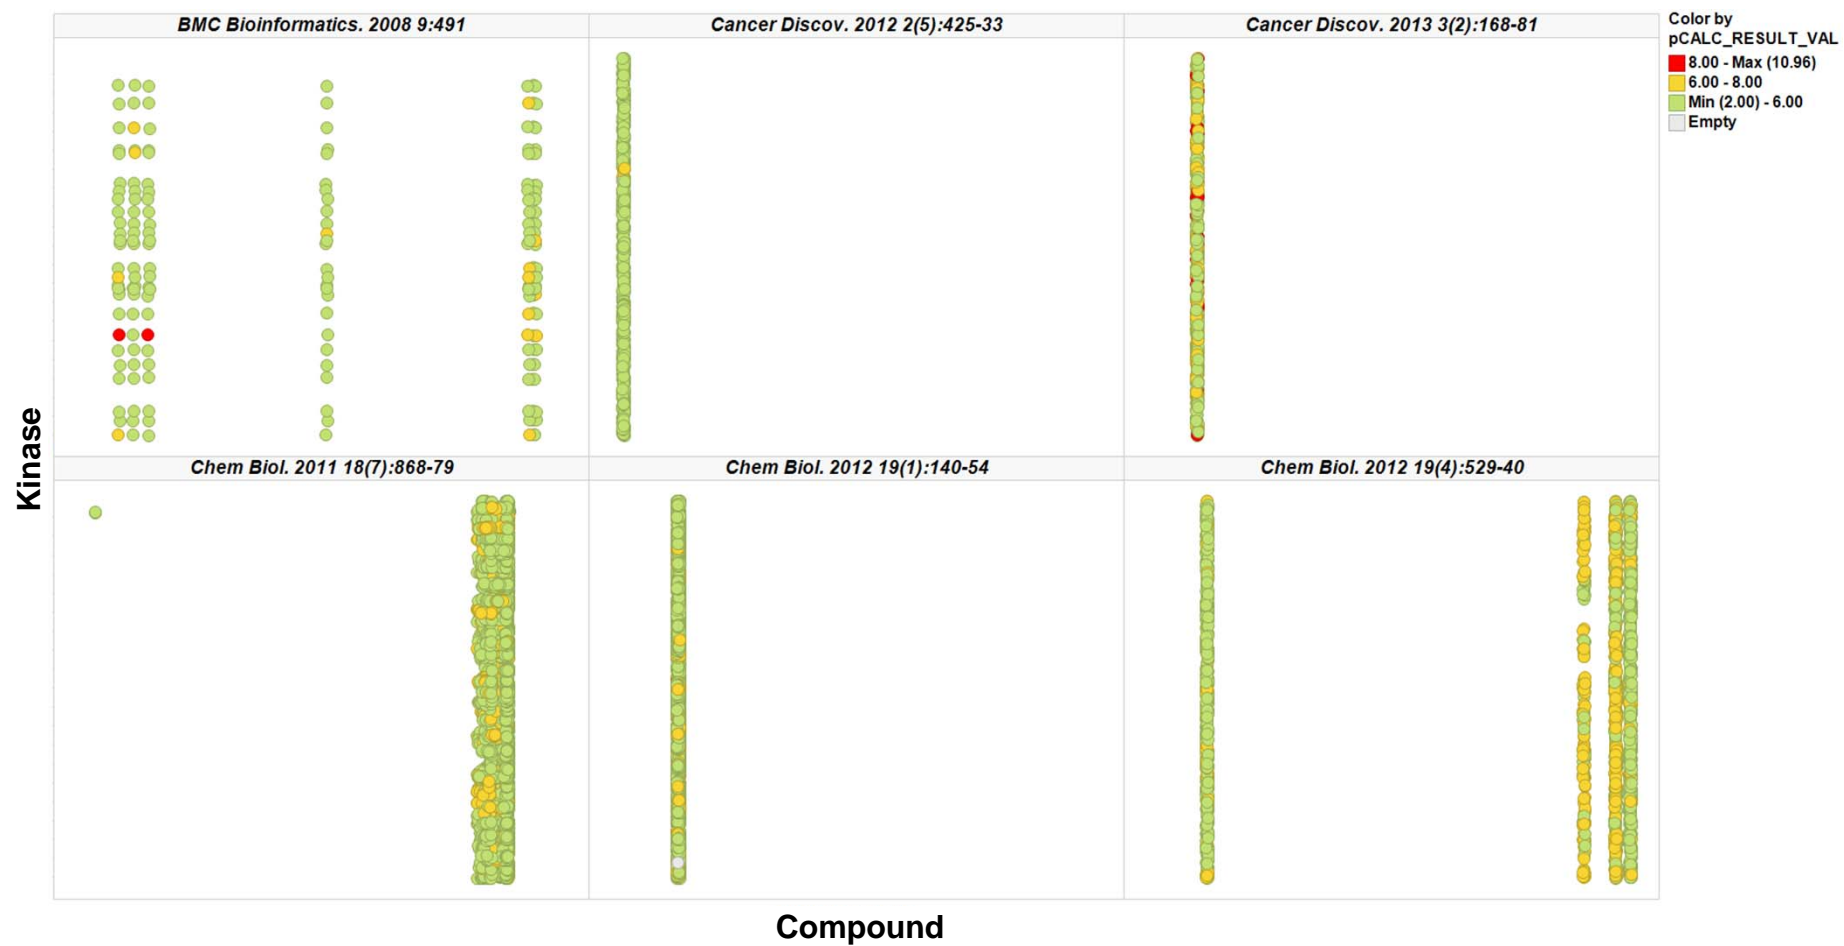

Figure S3. Coverage across data sources, at the Kinase level: (b) per data source

b)

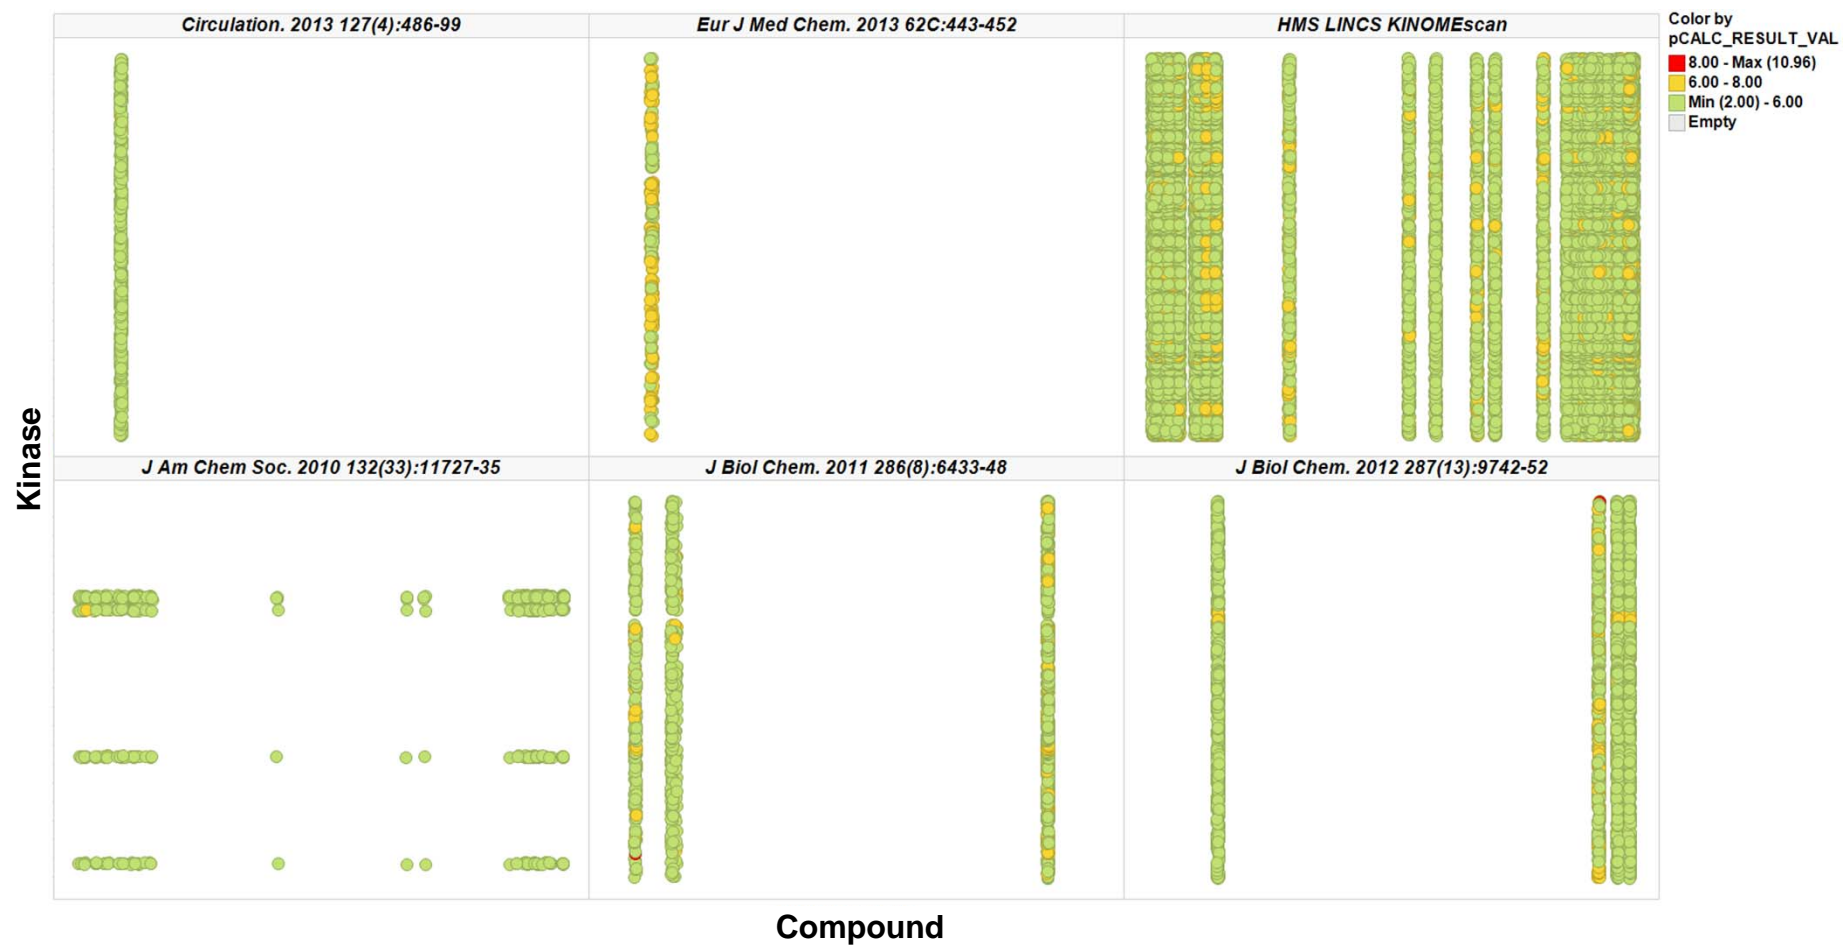

Figure S3. Coverage across data sources, at the Kinase level: (b) per data source

b)

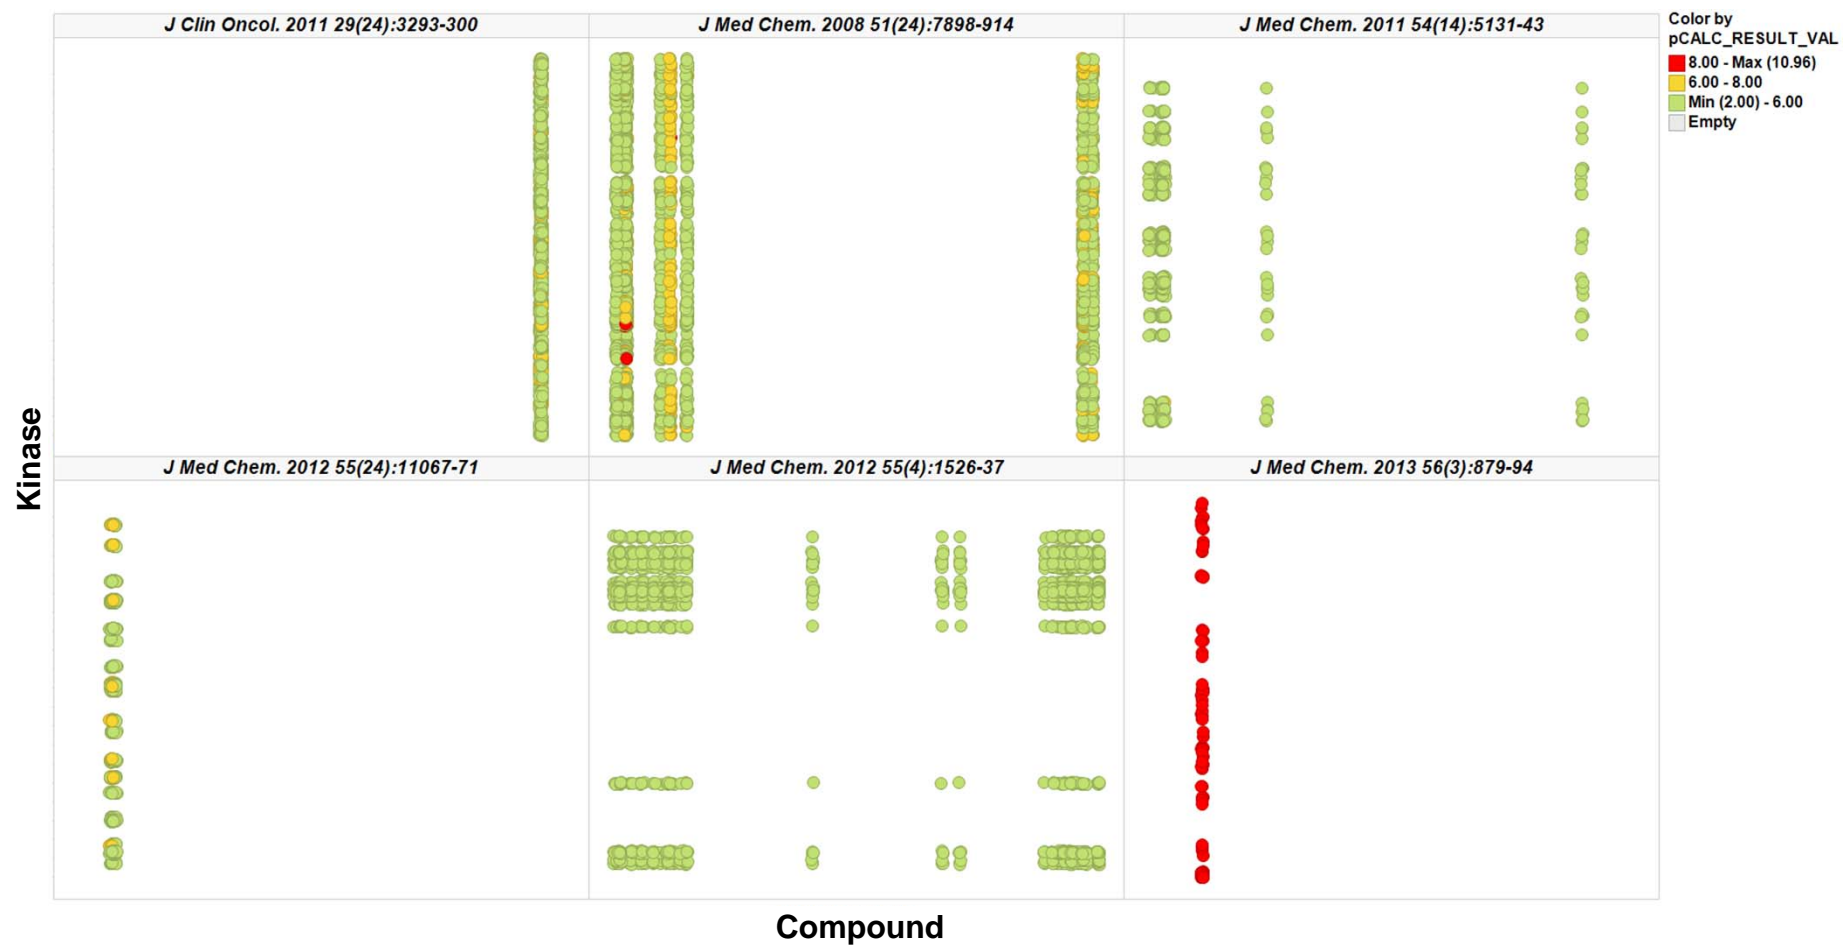

Figure S3. Coverage across data sources, at the Kinase level: (b) per data source

b)

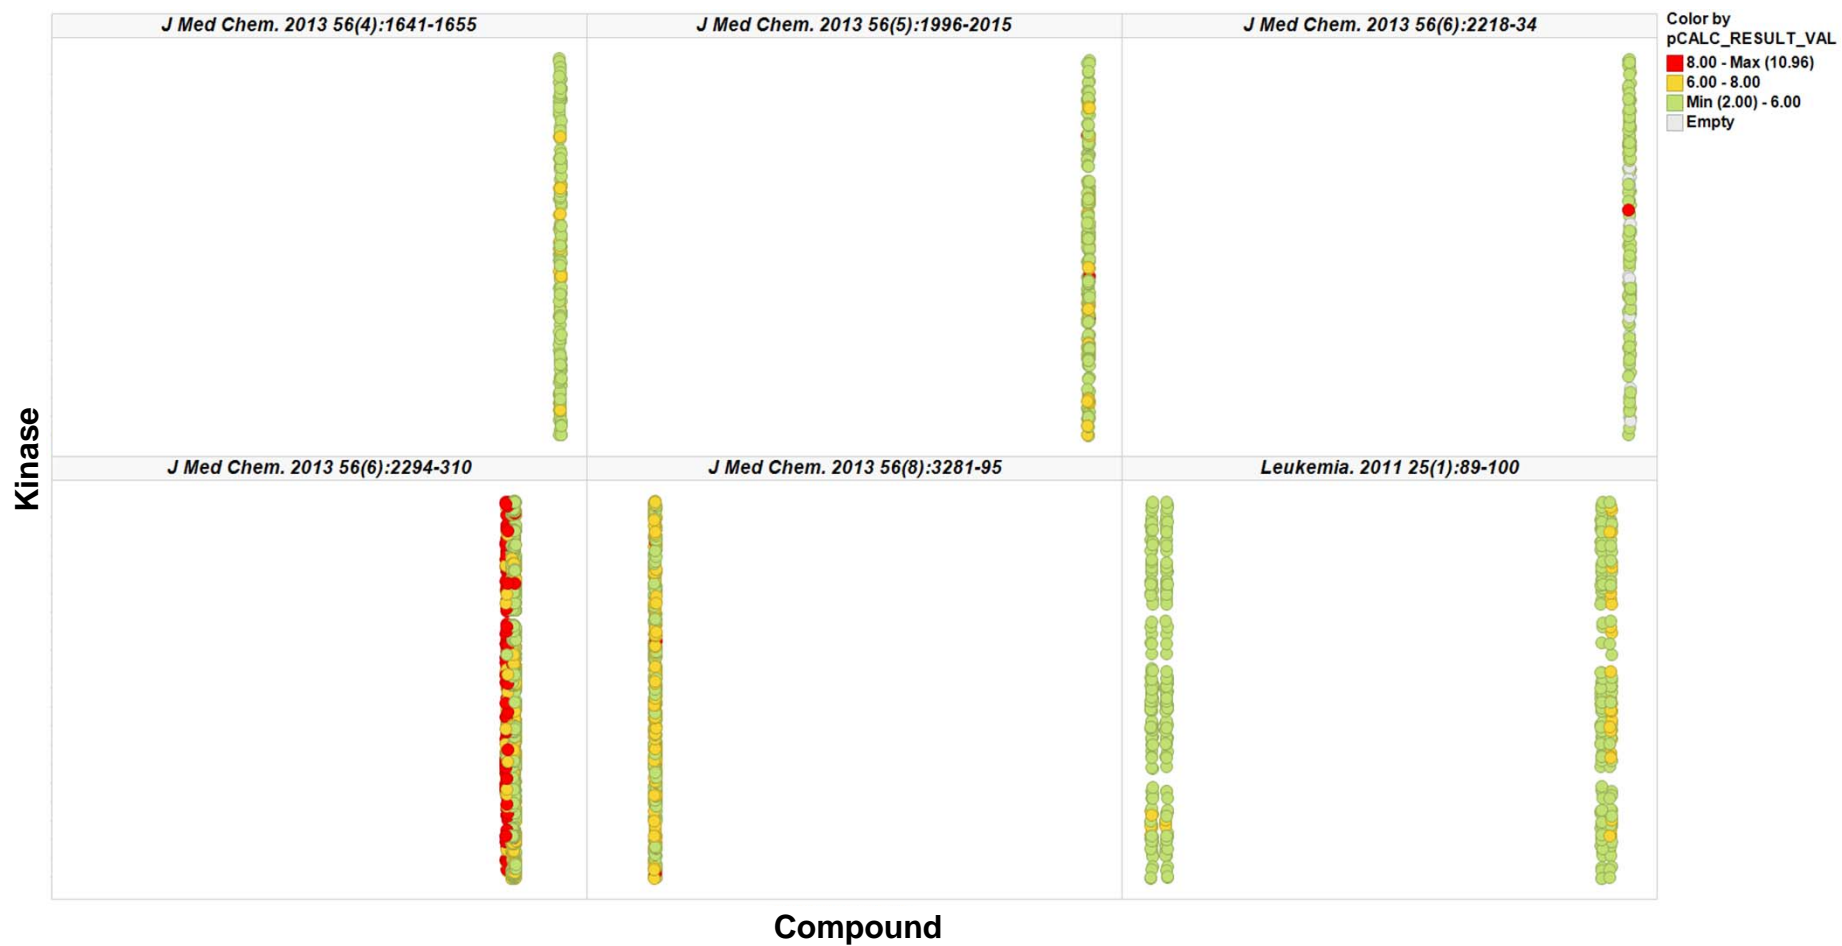

Figure S3. Coverage across data sources, at the Kinase level: (b) per data source

b)

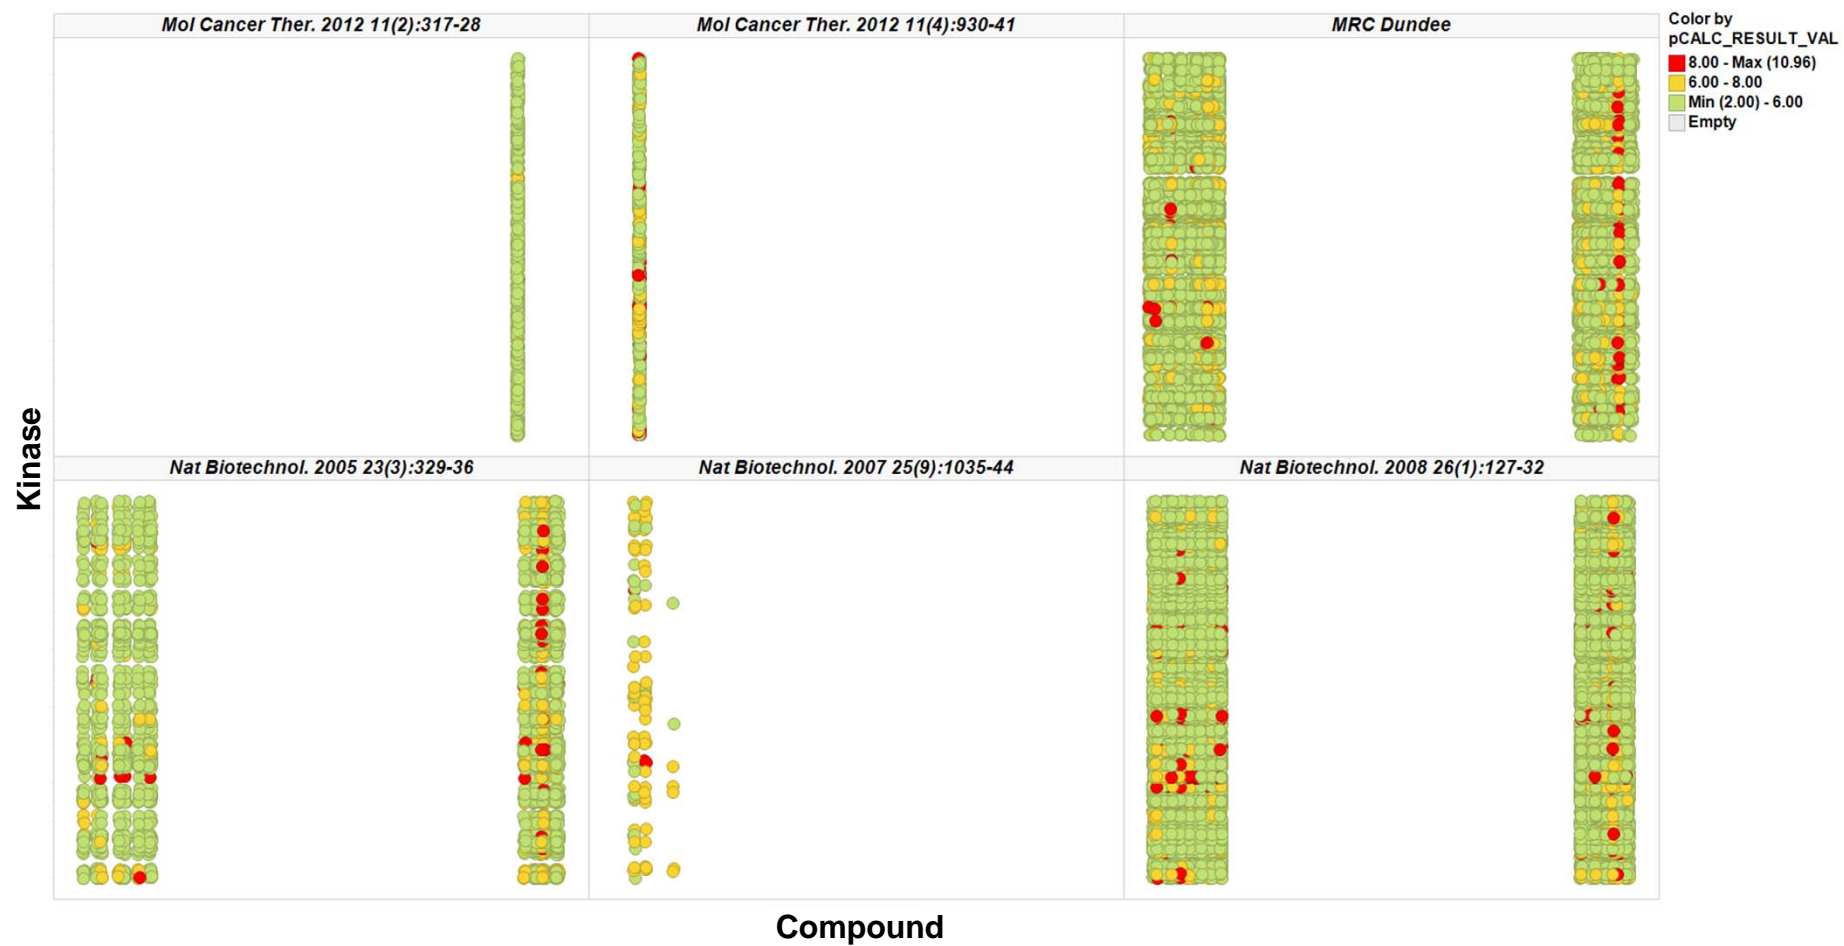

Figure S3. Coverage across data sources, at the Kinase level: (b) per data source



b)

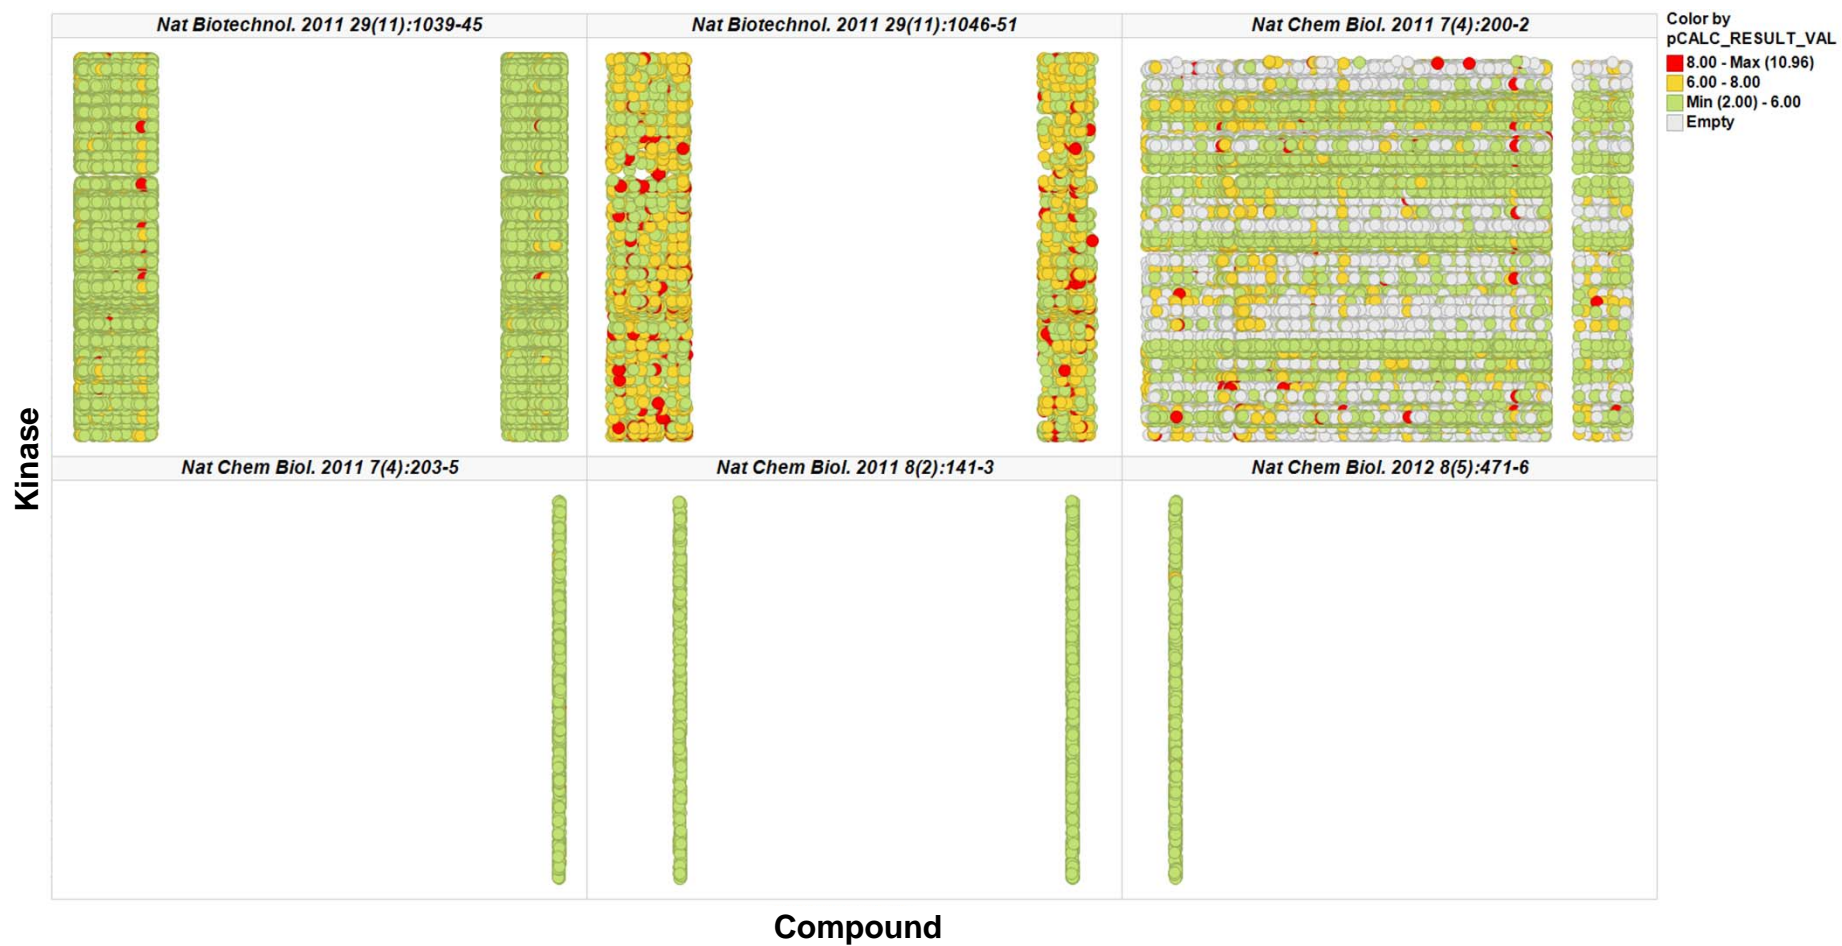

Figure S3. Coverage across data sources, at the Kinase level: (b) per data source

b)

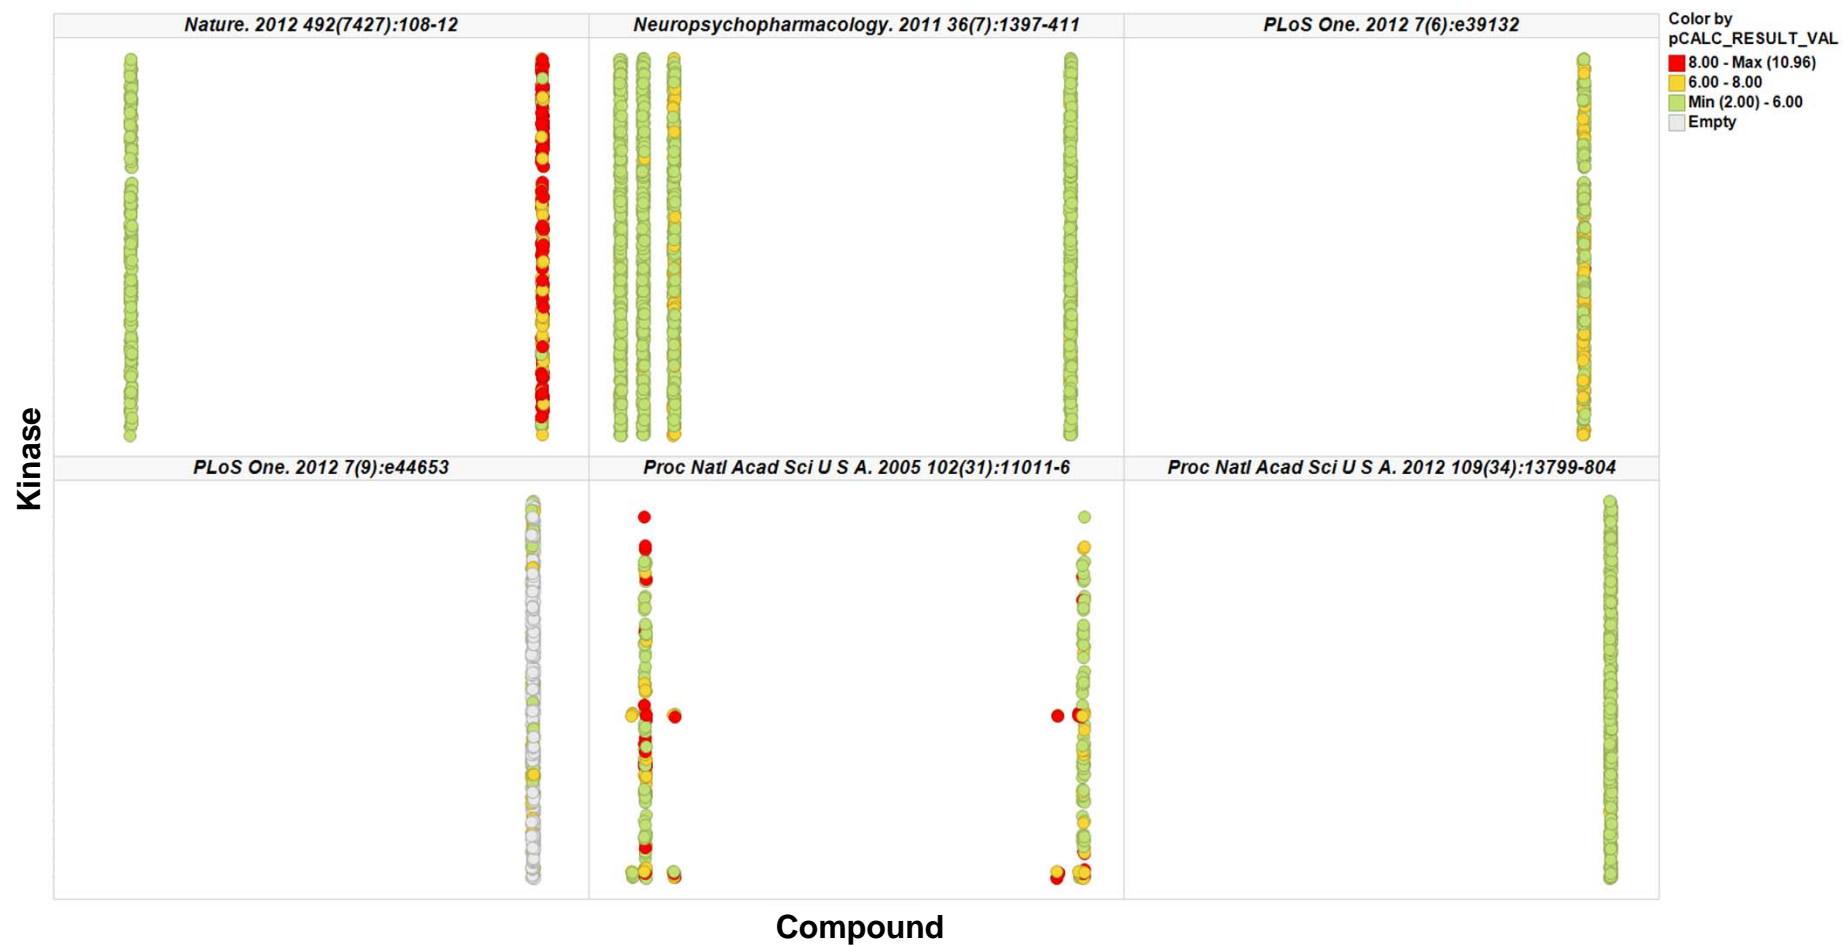

Figure S3. Coverage across data sources, at the Kinase level: (b) per data source

b)

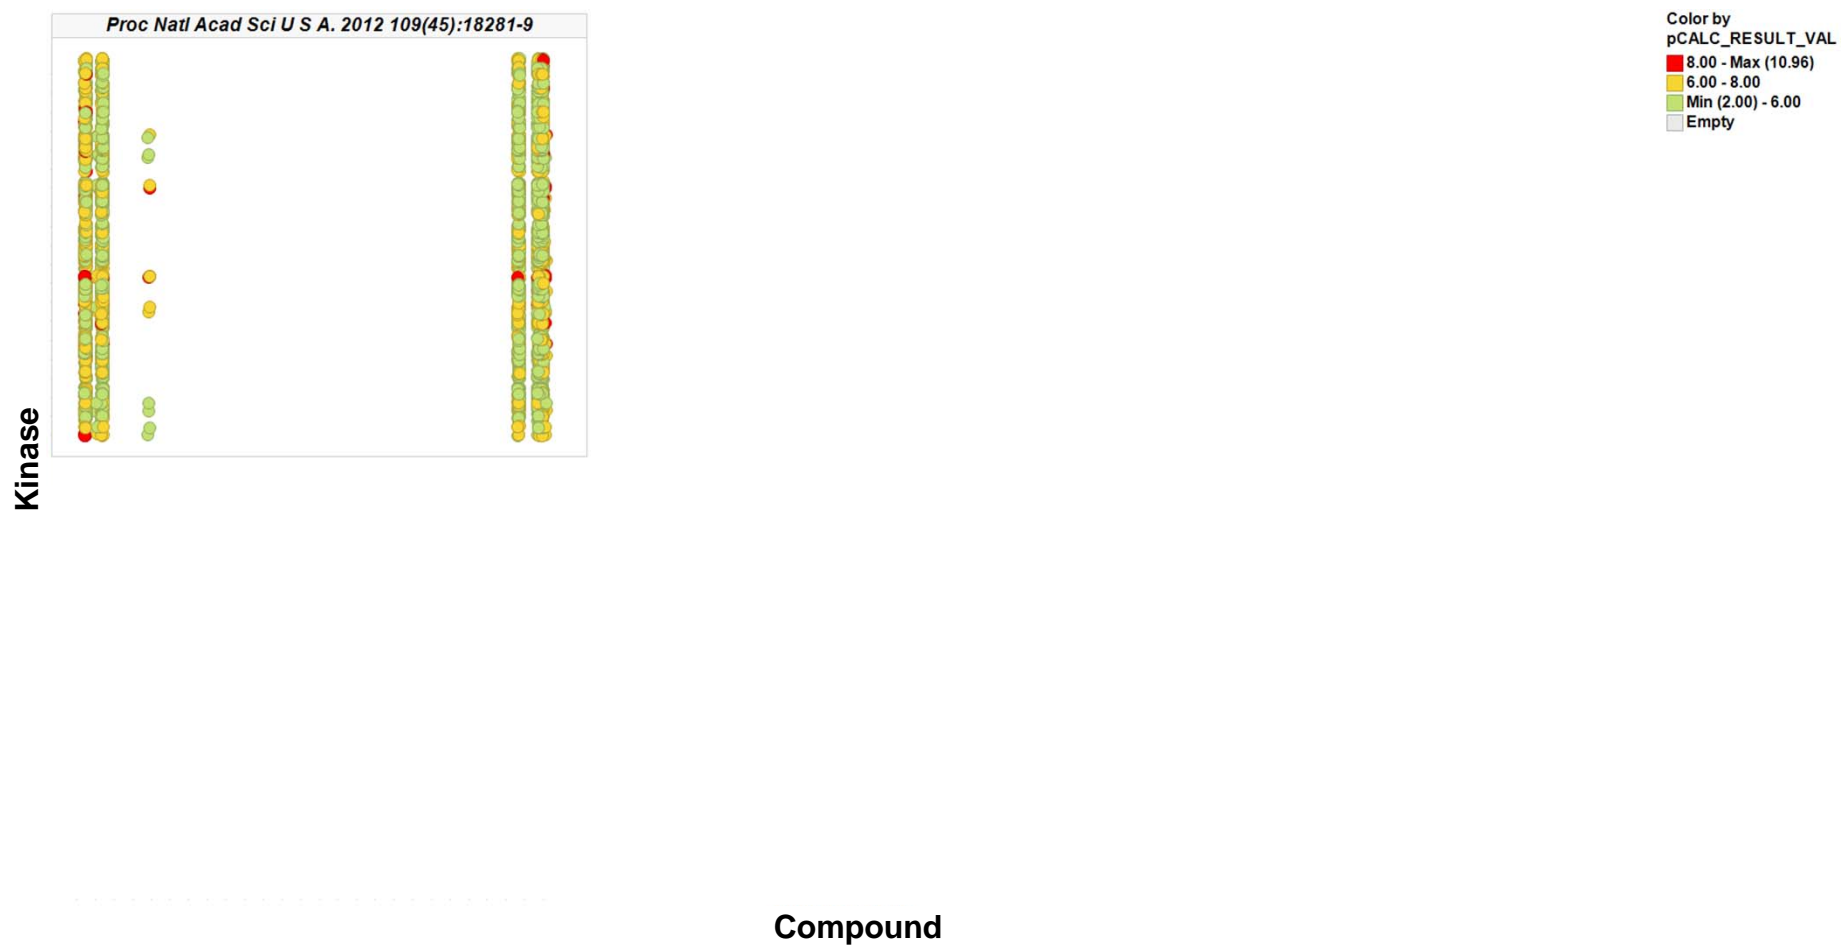

Figure S3. Coverage across data sources, at the Kinase level: (b) per data source

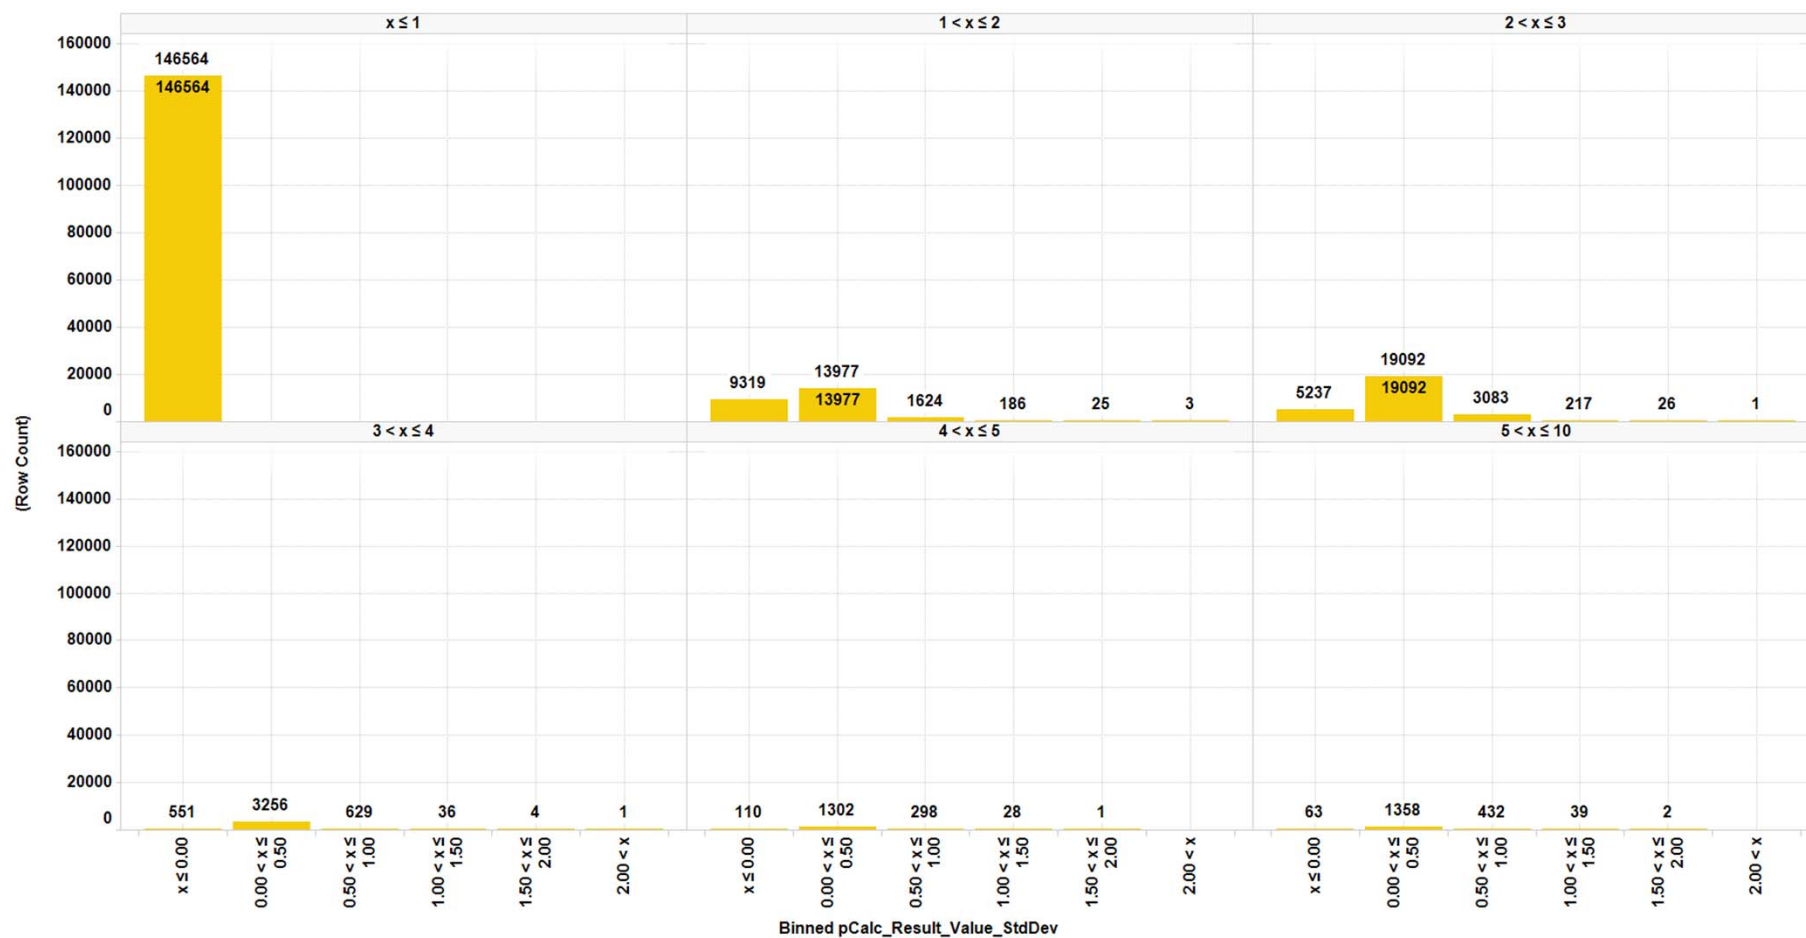

Figure S4. Distribution of the binned pStandardized\_Result\_Value\_SD, split by the number of measurements per Kinase-compound pair

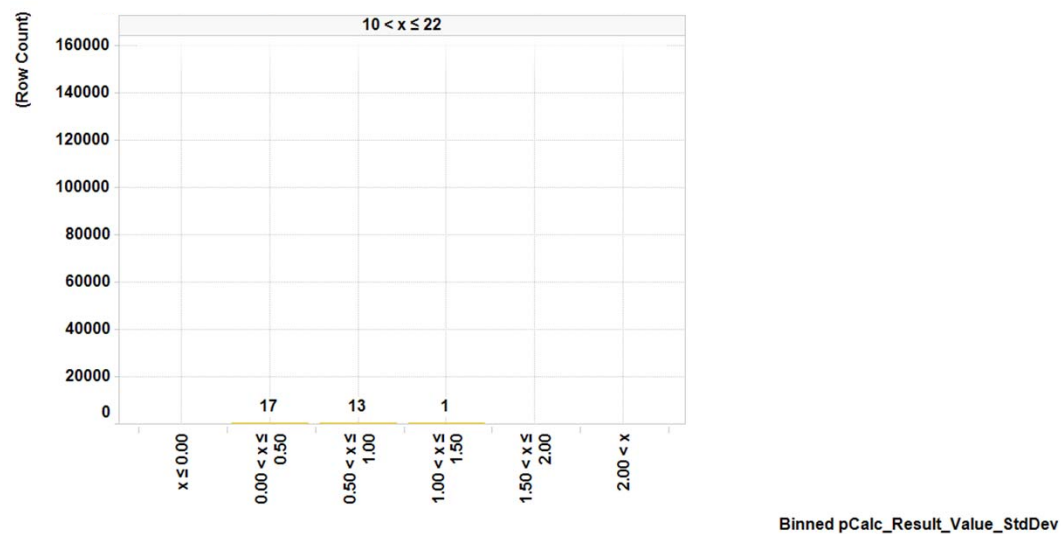

Figure S4. Distribution of the binned pStandardized\_Result\_Value\_SD, split by the number of measurements per Kinase-compound pair

Figure S5. Coverage of the kinome by compounds from the current dataset PKIs exhibiting a STD\_RESULT\_VALUE of 100 nM or less; the Kinases names and circles sizes are proportional to the number of corresponding measurements. The picture was generated using the Kinome Render<sup>4</sup> and the kinome tree illustration is reproduced courtesy of Cell Signaling Technology, Inc ([www.cellsignal.com](http://www.cellsignal.com))

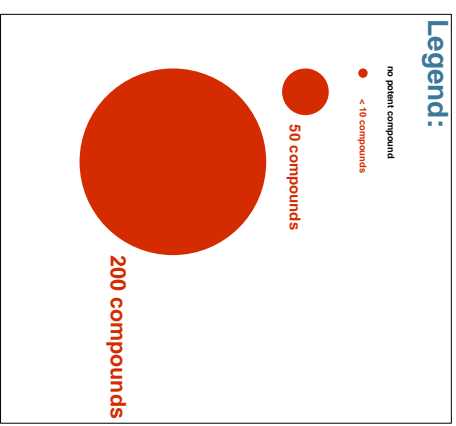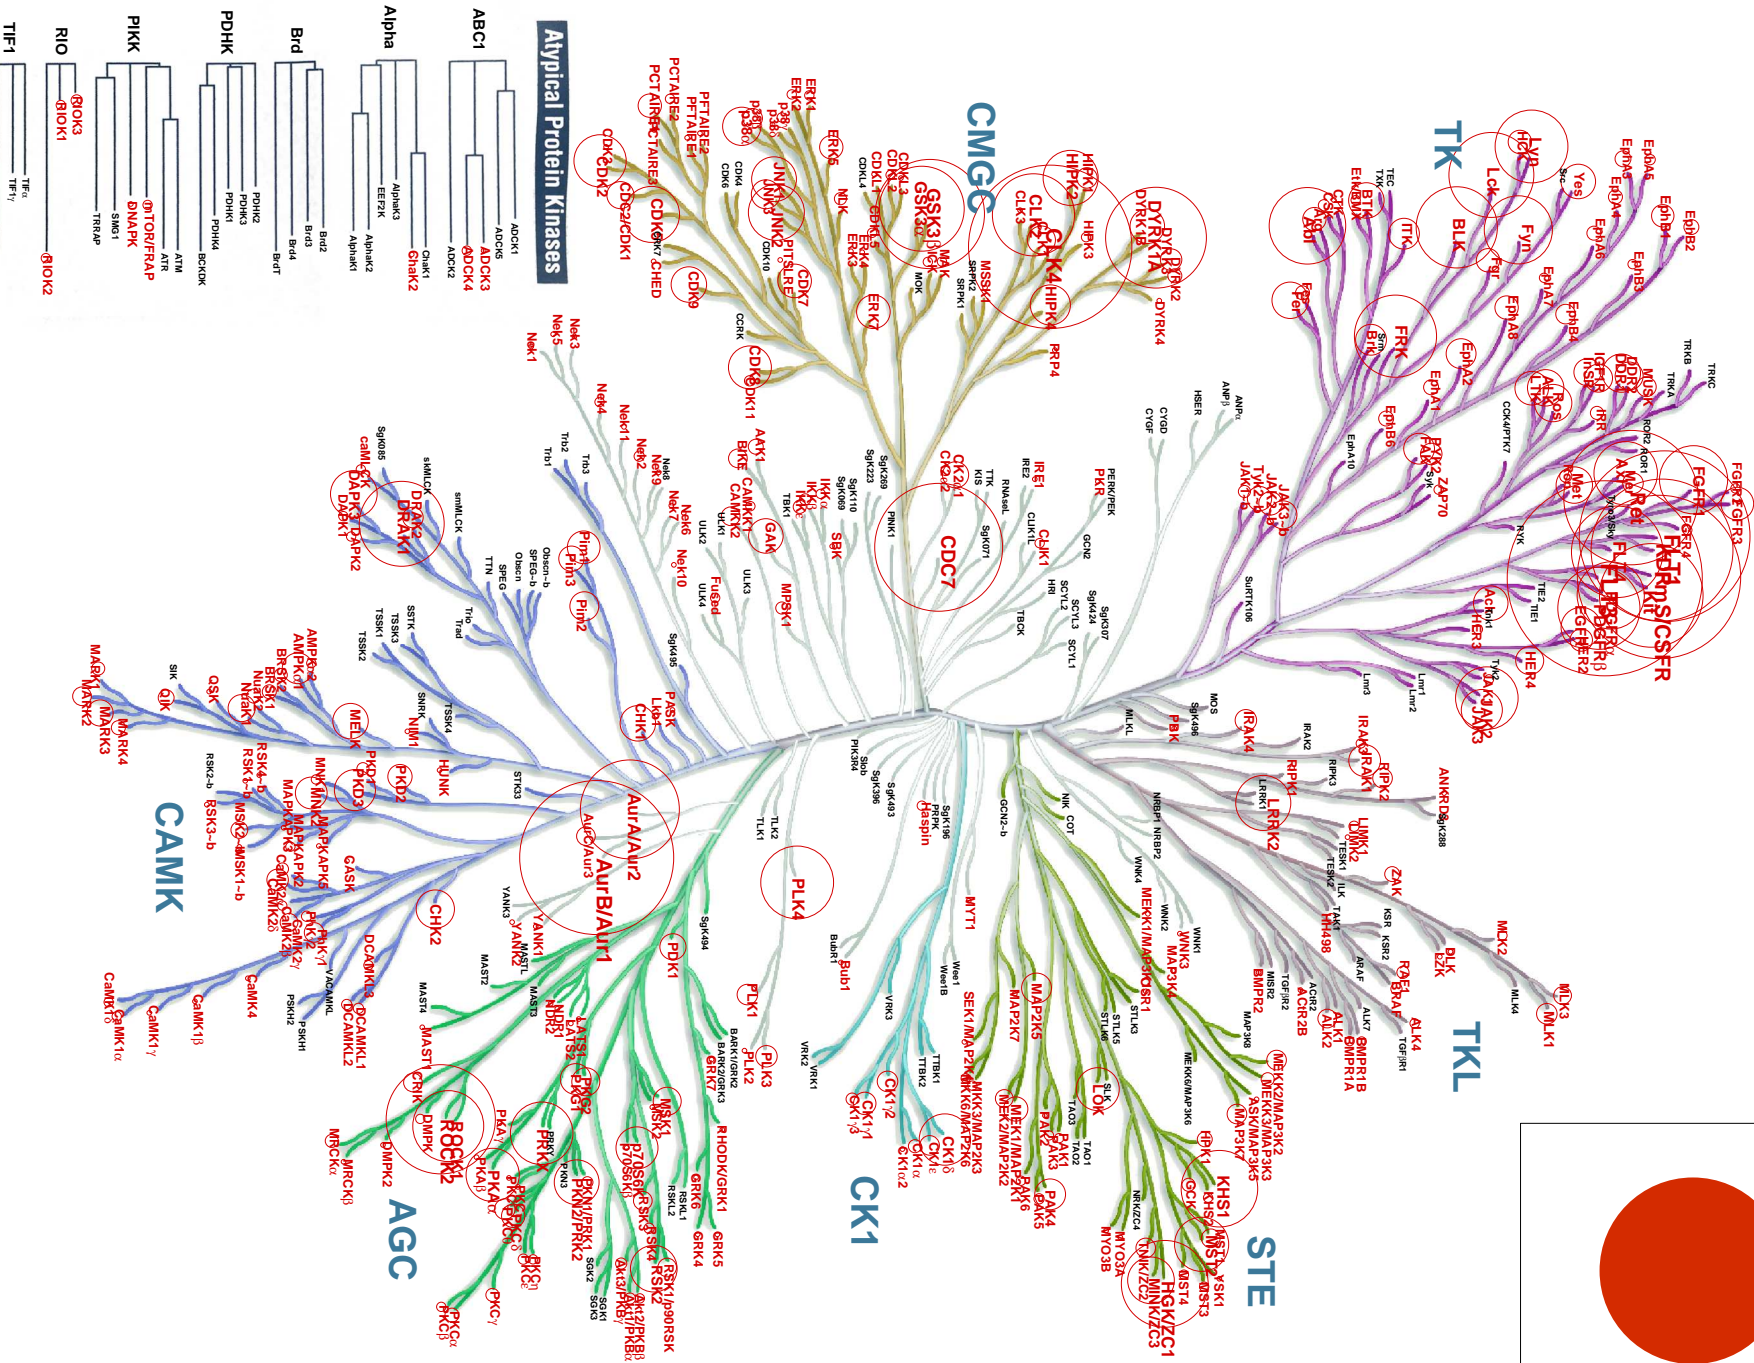

Illustration reproduced courtesy of Cell Signaling Technology, Inc. (www.cellsignal.com)

Figure S6. Spread of the SI\_k\_100nM values across the kinome, for the kinases with at least 100 compounds tested; the kinase names and circles sizes are proportional to the SI\_k\_100nM values. The picture was generated using the Kinome Render<sup>4</sup> and the kinome tree illustration is reproduced courtesy of Cell Signaling Technology, Inc ([www.cellsignal.com](http://www.cellsignal.com))



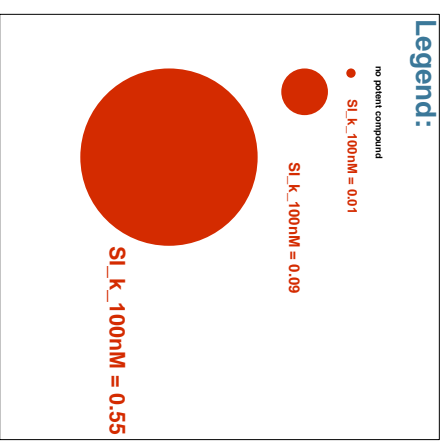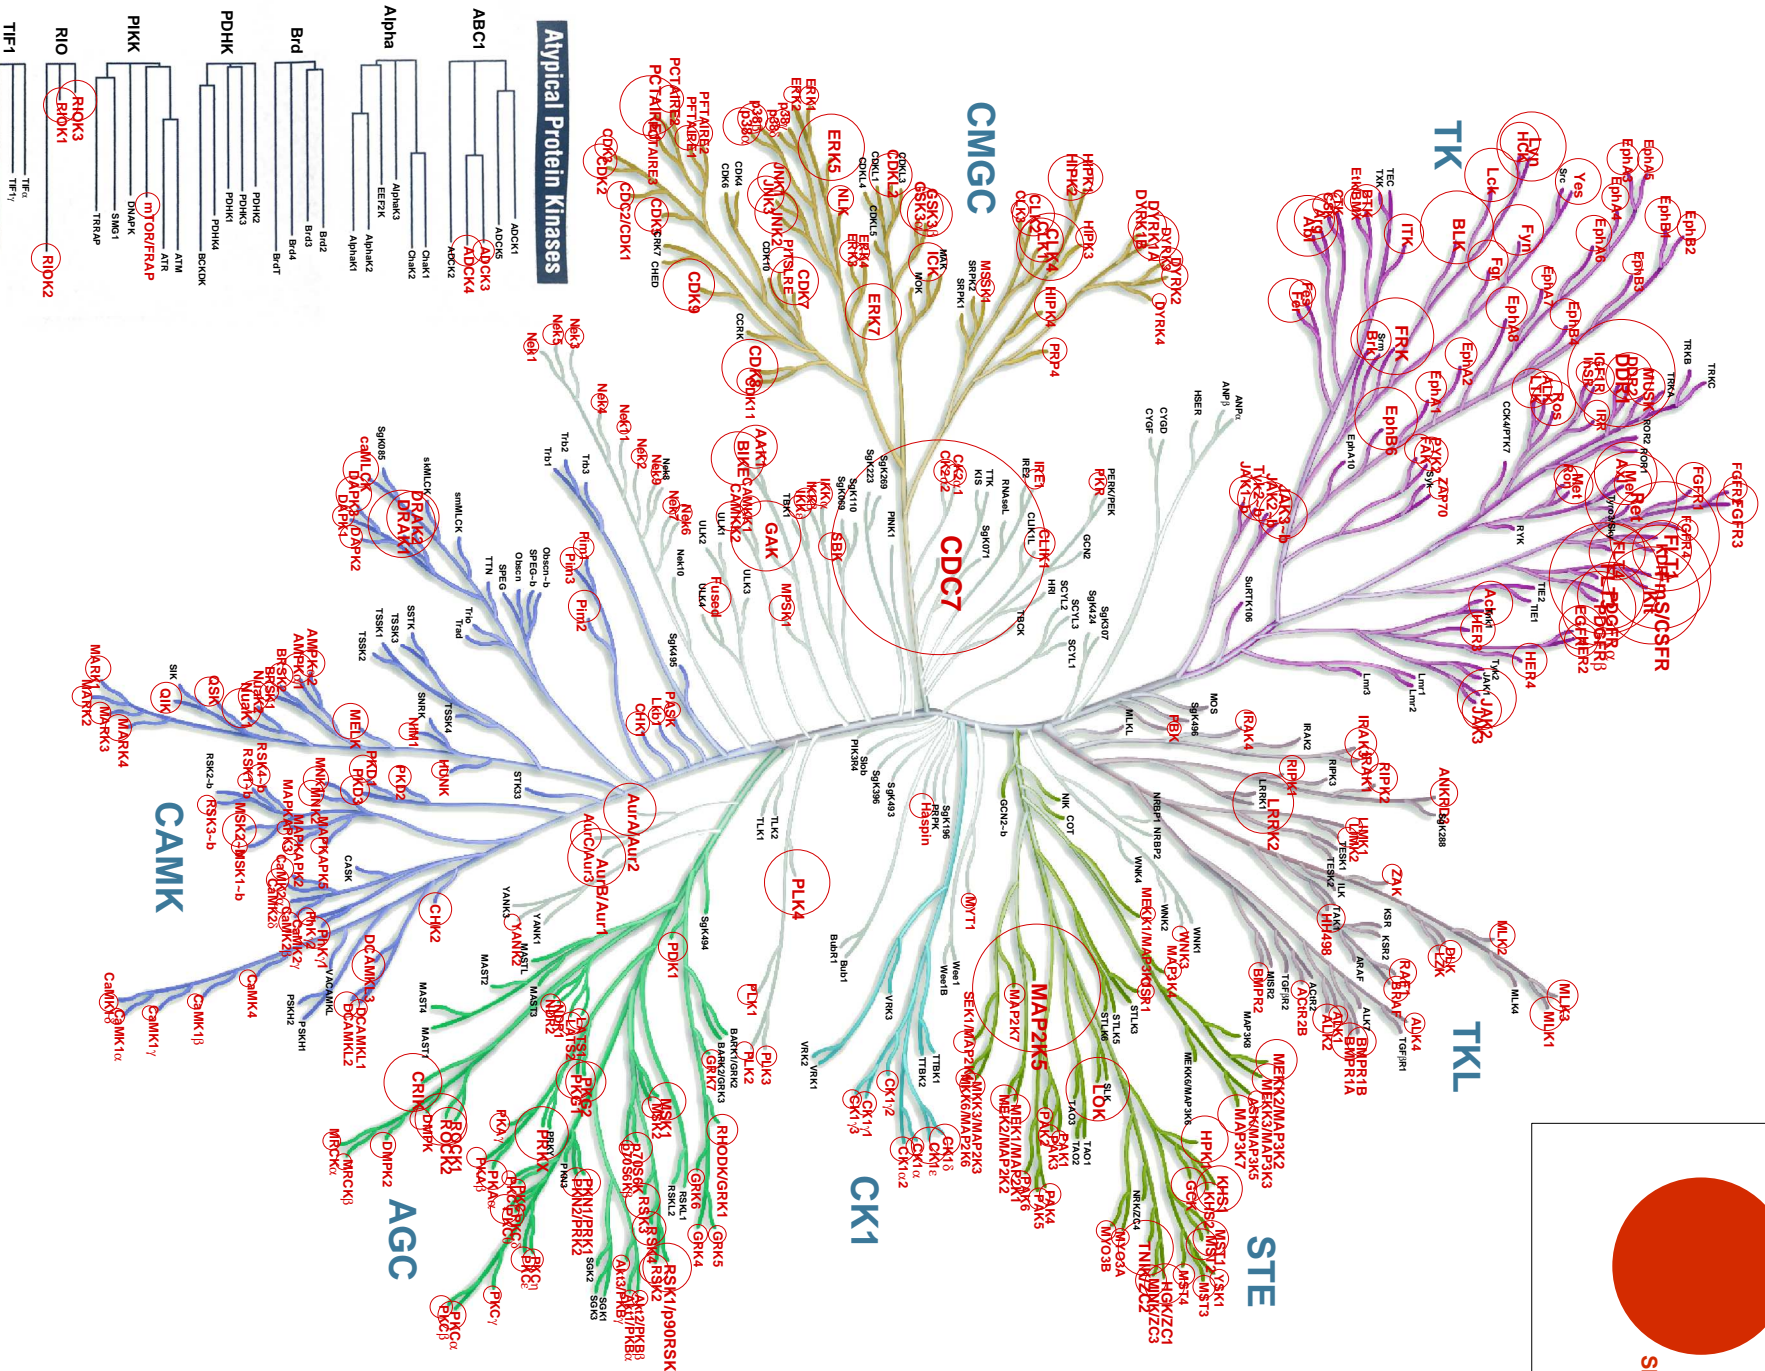

Illustration reproduced courtesy of Cell Signaling Technology, Inc. (www.cellsignal.com)

| Structures                                                                          |                                                                                   |                                                                                   |                                                                                    |                                                                                     |                                                                                     |                                                                                     |                                                                                     |
|-------------------------------------------------------------------------------------|-----------------------------------------------------------------------------------|-----------------------------------------------------------------------------------|------------------------------------------------------------------------------------|-------------------------------------------------------------------------------------|-------------------------------------------------------------------------------------|-------------------------------------------------------------------------------------|-------------------------------------------------------------------------------------|
| Sunitinib                                                                           | Sorafenib                                                                         | Tandutinib                                                                        | Pazopanib                                                                          | PKC 412                                                                             | Staurosporine                                                                       | Go 6976                                                                             | AS601245                                                                            |
| 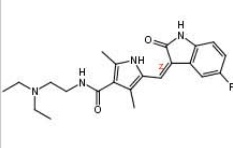   |  |  |  |  |  |  |  |
| Kinase Count: 484<br>Indirubin 6bromo oxime                                         | Kinase Count: 501<br>Skepinone L                                                  | Kinase Count: 470<br>SB 203580                                                    | Kinase Count: 448<br>JNK IN 8                                                      | Kinase Count: 503<br>JNK IN 7                                                       | Kinase Count: 487<br>PD 0325901                                                     | Kinase Count: 501<br>Tyrphostin AG1478                                              | Kinase Count: 518<br>Akti 1 2                                                       |
|    |  |  |  |  |  |  |  |
| Kinase Count: 493<br>JNK Inhibitor IX                                               | Kinase Count: 479<br>AR A0 14418                                                  | Kinase Count: 468<br>PI 103                                                       | Kinase Count: 447<br>HG 10 102 01                                                  | Kinase Count: 446<br>GSK 2578215A                                                   | Kinase Count: 446<br>SB 202190                                                      | Kinase Count: 525<br>GW 2580                                                        | Kinase Count: 523<br>JNJ 7706621                                                    |
|    |  |  |  |  |  |  |  |
| Kinase Count: 521<br>Torin1                                                         | Kinase Count: 503                                                                 | Kinase Count: 471                                                                 | Kinase Count: 460                                                                  | Kinase Count: 459                                                                   | Kinase Count: 453                                                                   | Kinase Count: 450                                                                   | Kinase Count: 450                                                                   |
|  |                                                                                   |                                                                                   |                                                                                    |                                                                                     |                                                                                     |                                                                                     |                                                                                     |
|  |                                                                                   |                                                                                   |                                                                                    |                                                                                     |                                                                                     |                                                                                     |                                                                                     |
| Kinase Count: 449                                                                   |                                                                                   |                                                                                   |                                                                                    |                                                                                     |                                                                                     |                                                                                     |                                                                                     |

Figure S7. Structures of the 25 PKIs exhibiting the highest number of Kinases

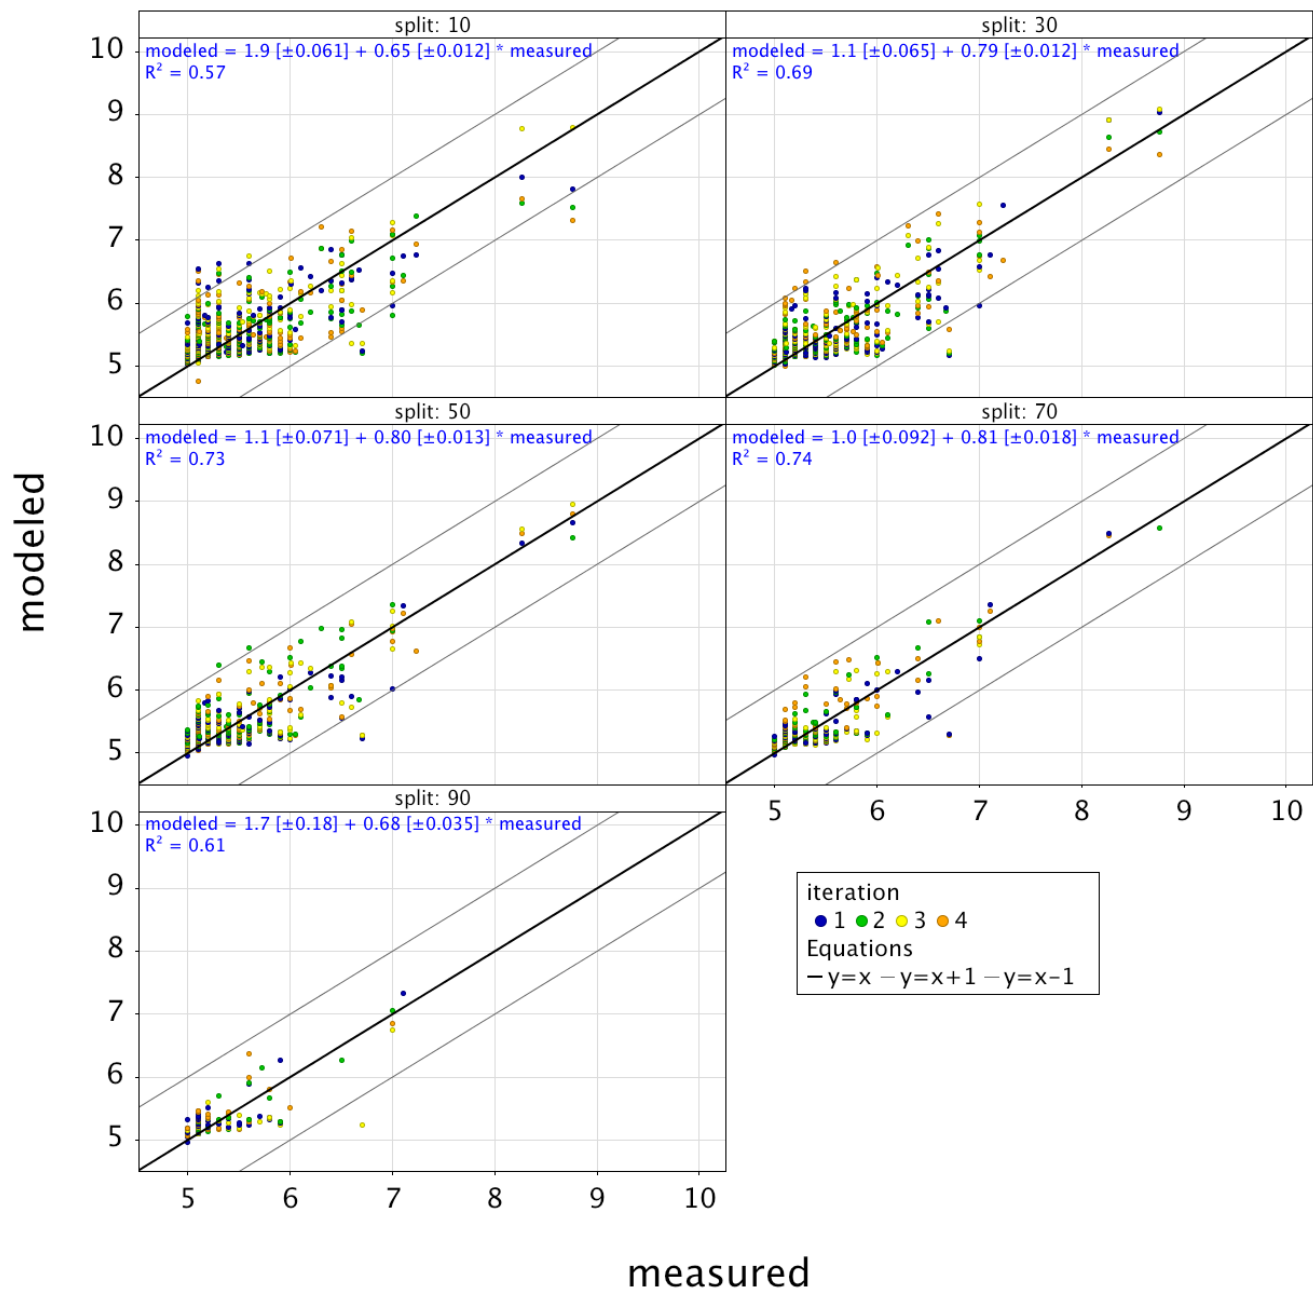

Figure S8. Example of a well modeled kinase: CAMK2B

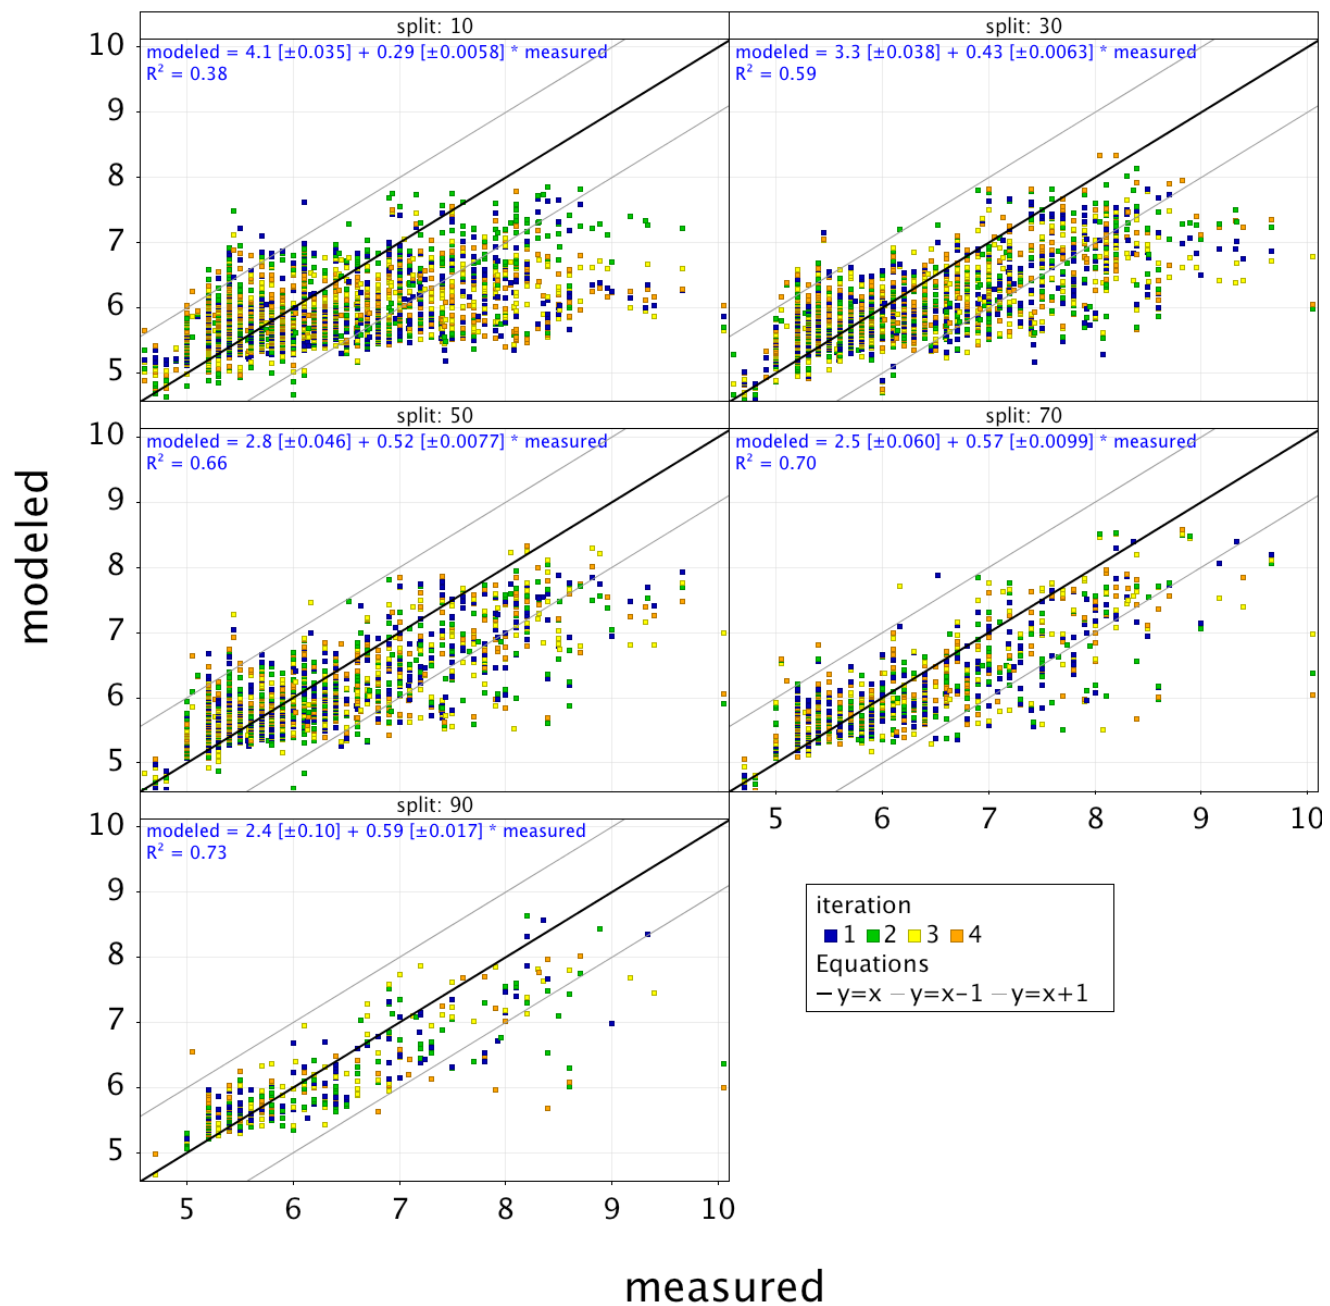

Figure S9. Example of a poorly modeled kinase: GSK3B

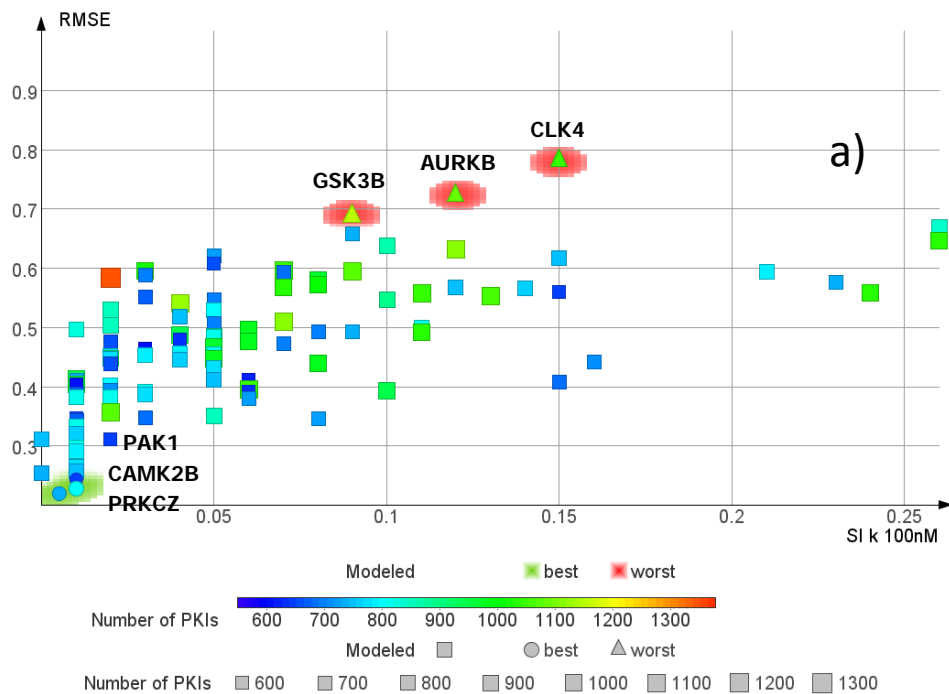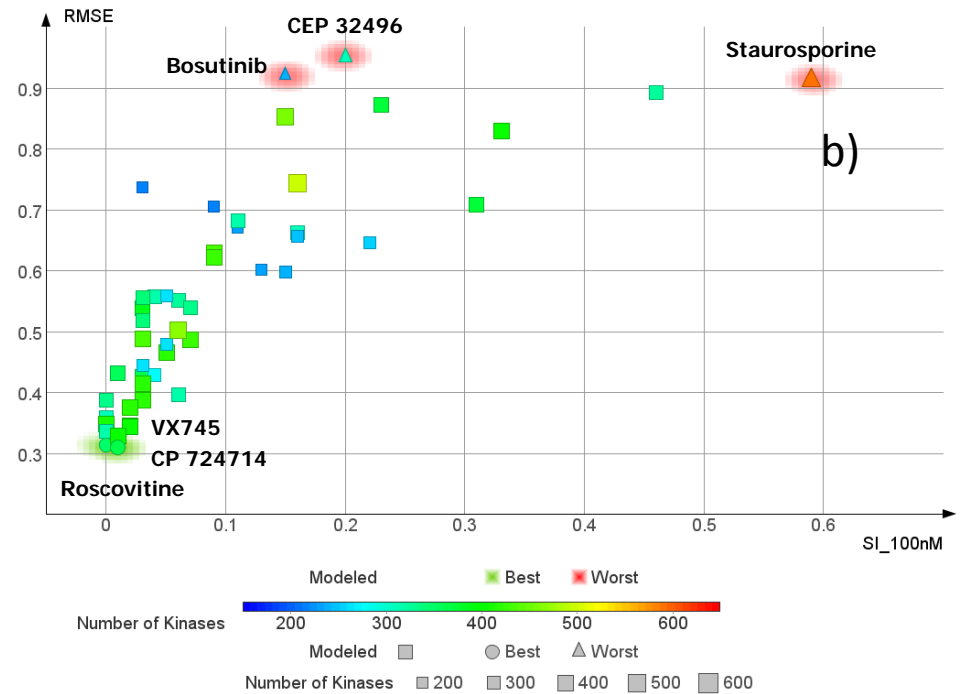

Figure S10. Comparison between RMSE and SI\_(k)\_100nM values for the Kinases

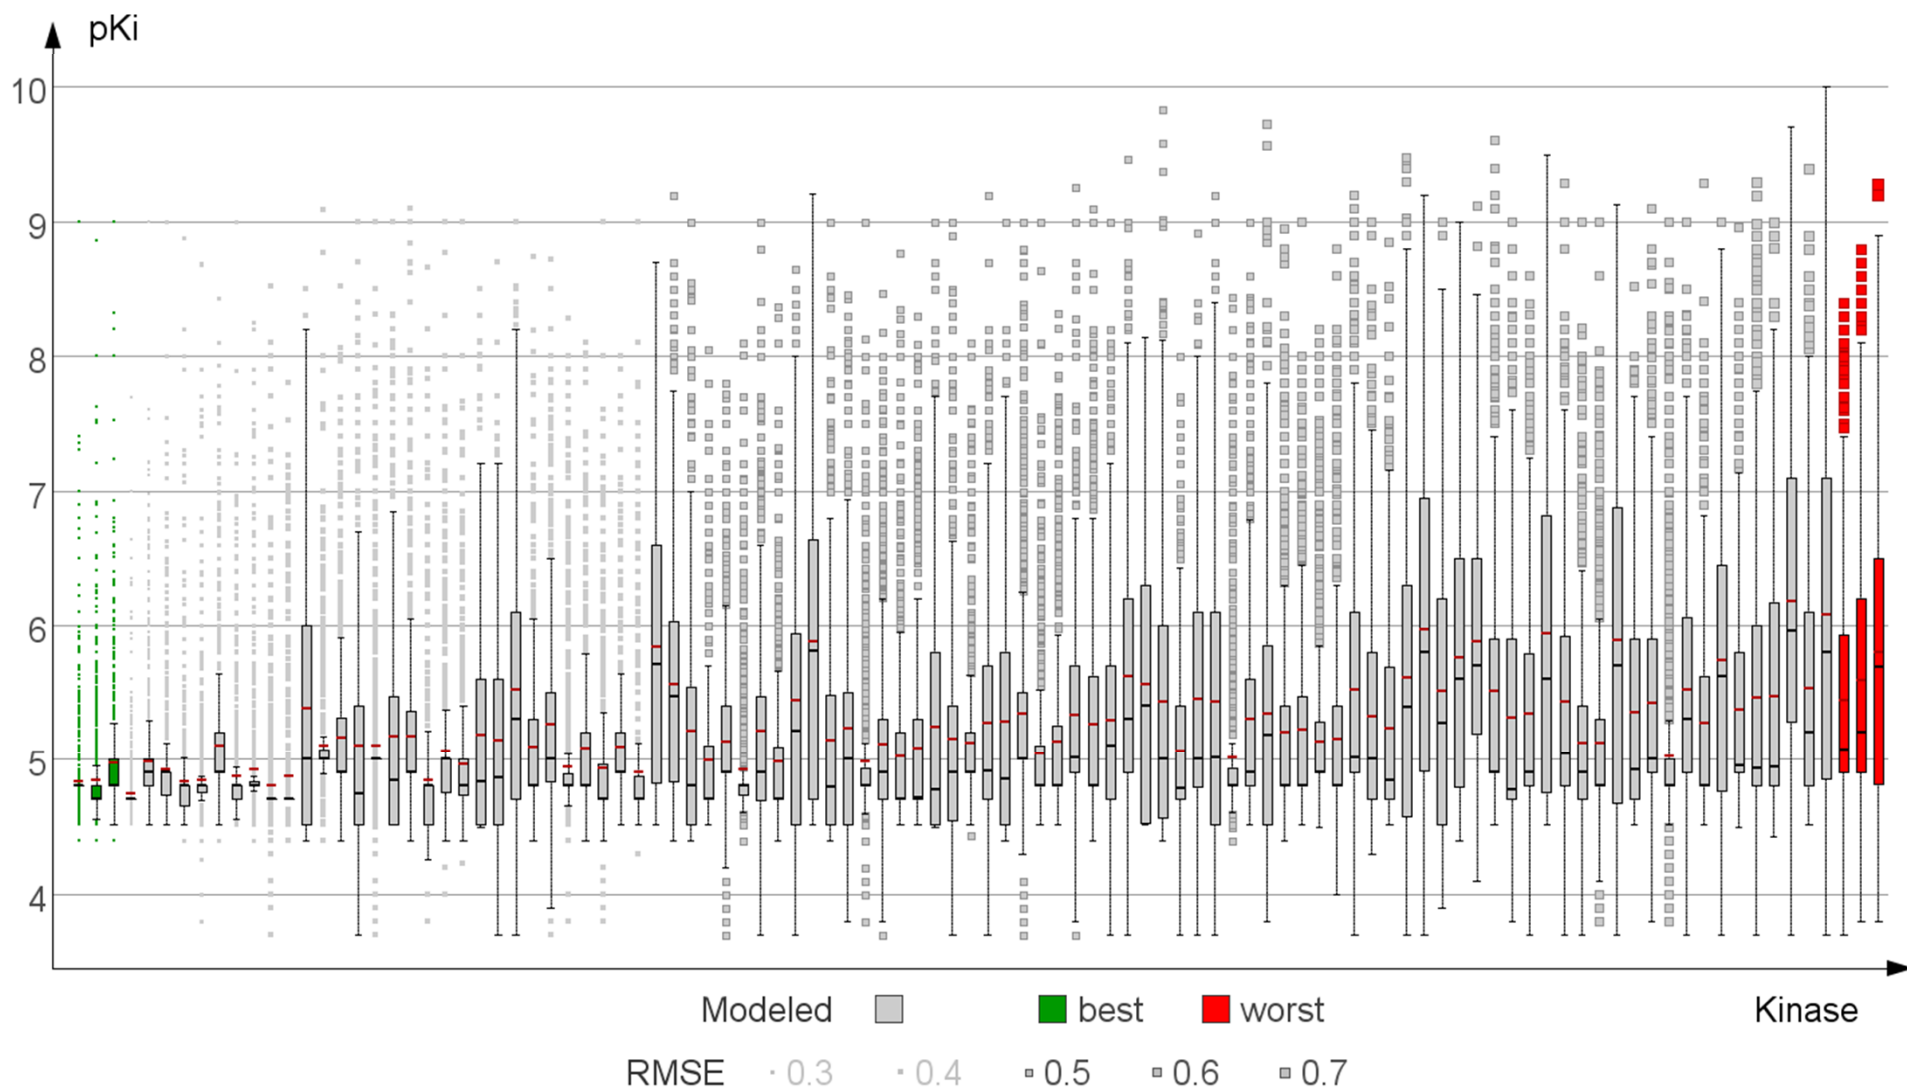

Figure S11. Influence of the spread of pKi values on the RMSE for the Kinases. The Kinases (x axis) are ordered by increasing RMSE value. The boxplots depict the first and third quartiles of the data, and the red and black lines correspond to the mean and median pKi values respectively

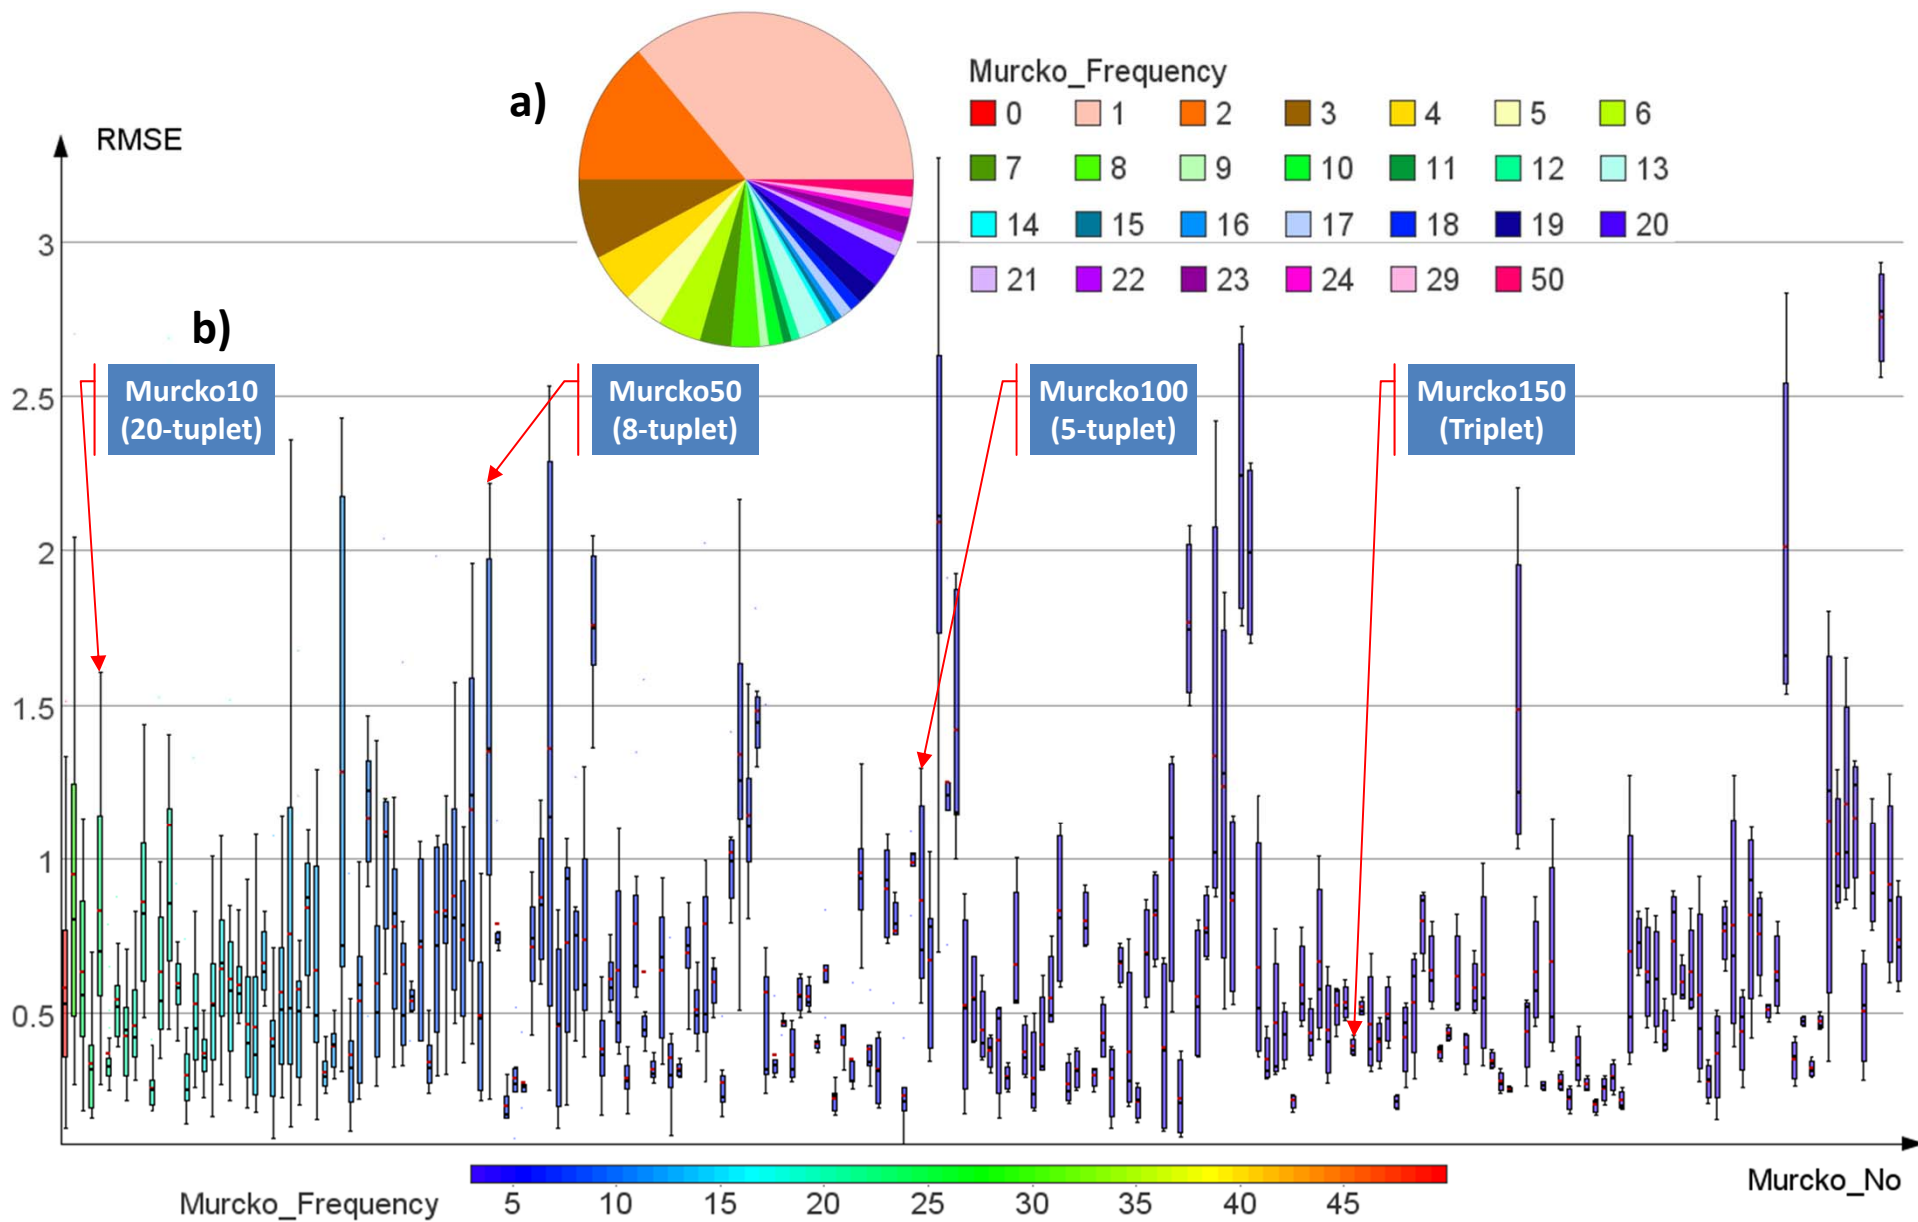

Figure S12. a) (inset): relative populations of singletons, pairs, etc...

b) Boxplot of the RMSE vs the Murcko fragment No (the Murcko fragments have been numbered by decreasing population: Murcko N1 is the most populated one with 22 compounds)

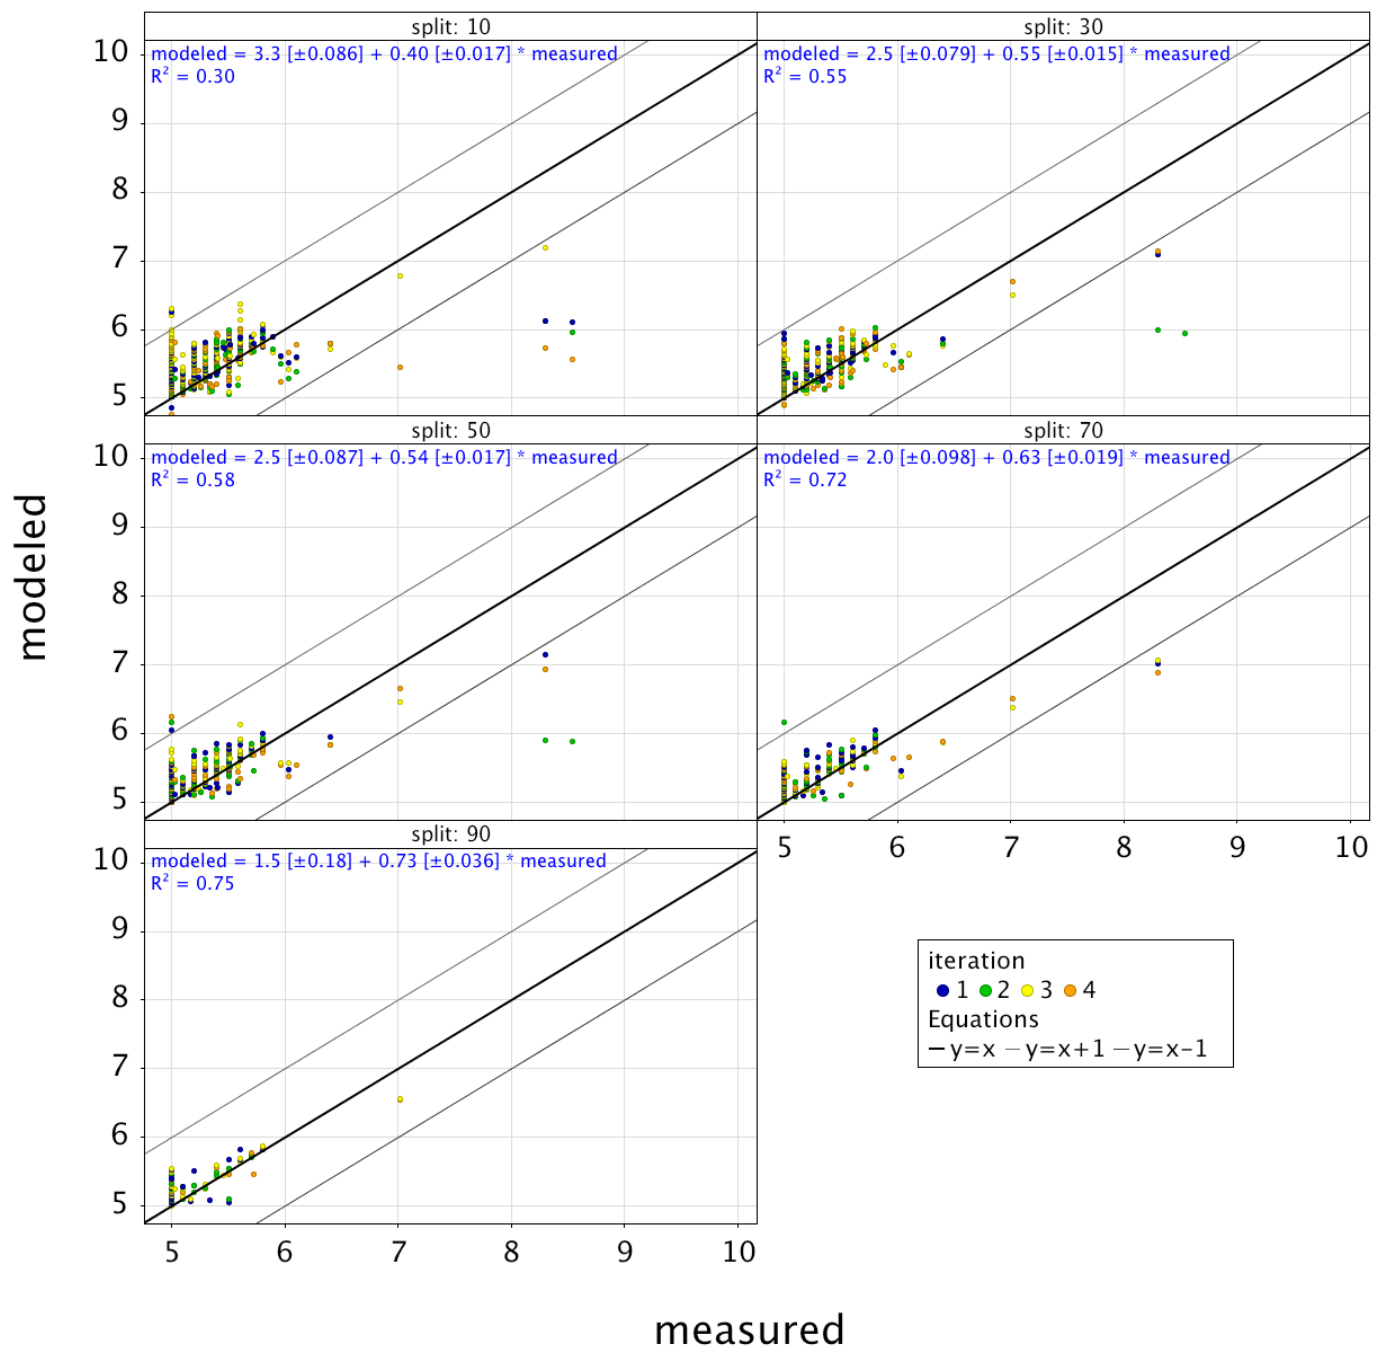

Figure S13. Example of a well modeled compound: VX745



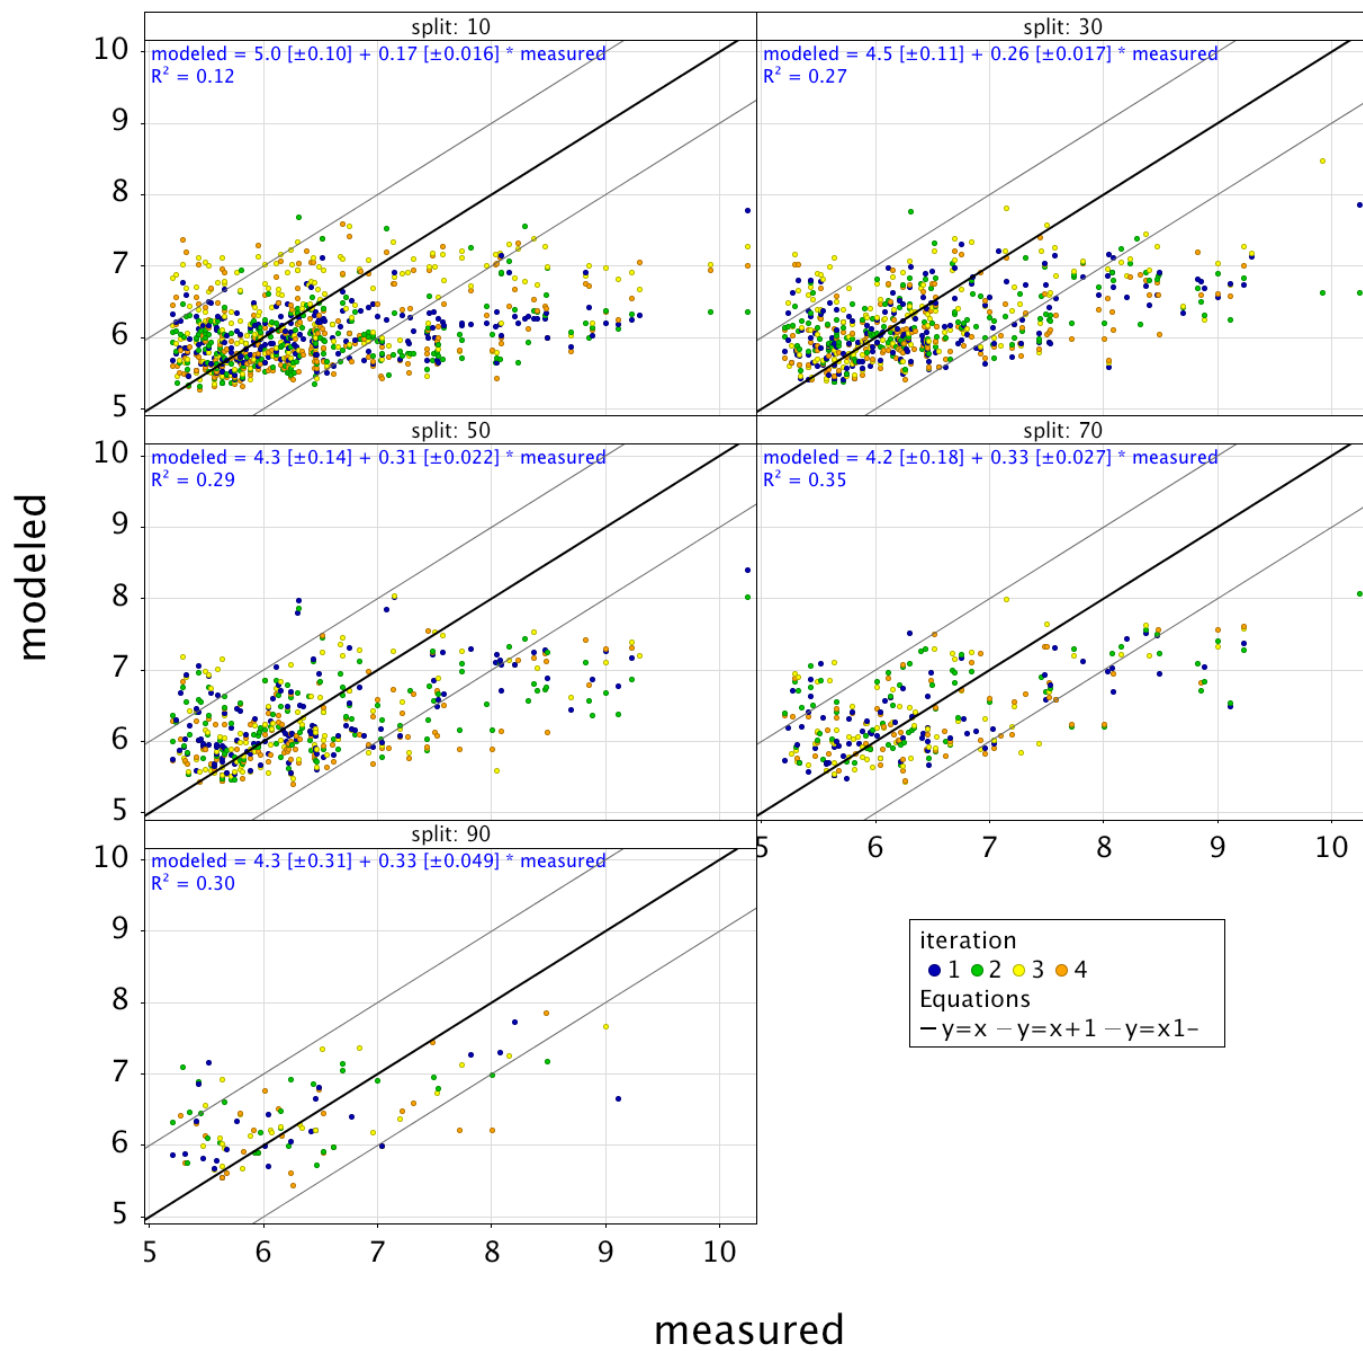

Figure S14. Example of a poorly modeled compound: Bosutinib

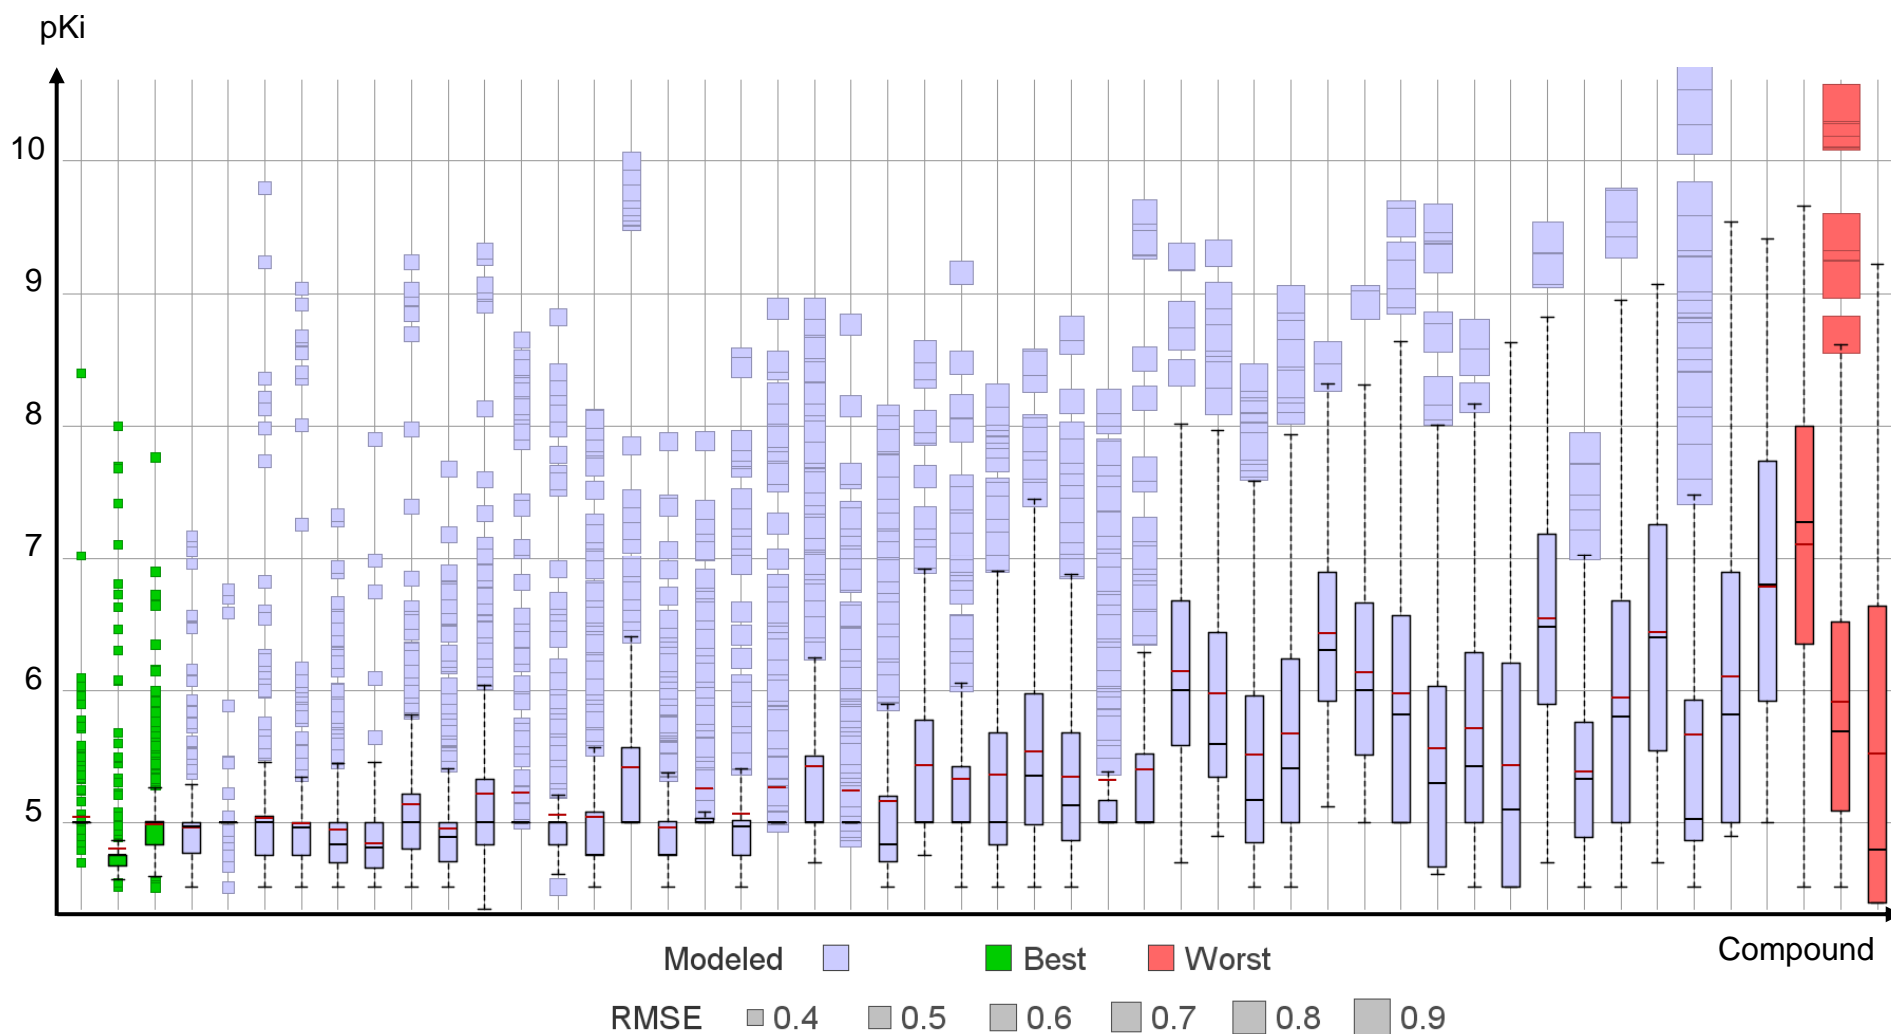

Figure S15. Influence of the spread of pKi values on the RMSE for the PKIs. The PKIs (x axis) are ordered by increasing RMSE value. The box plots depict the first and third quartiles of the data, and the red and black lines correspond to the mean and median pKi values respectively

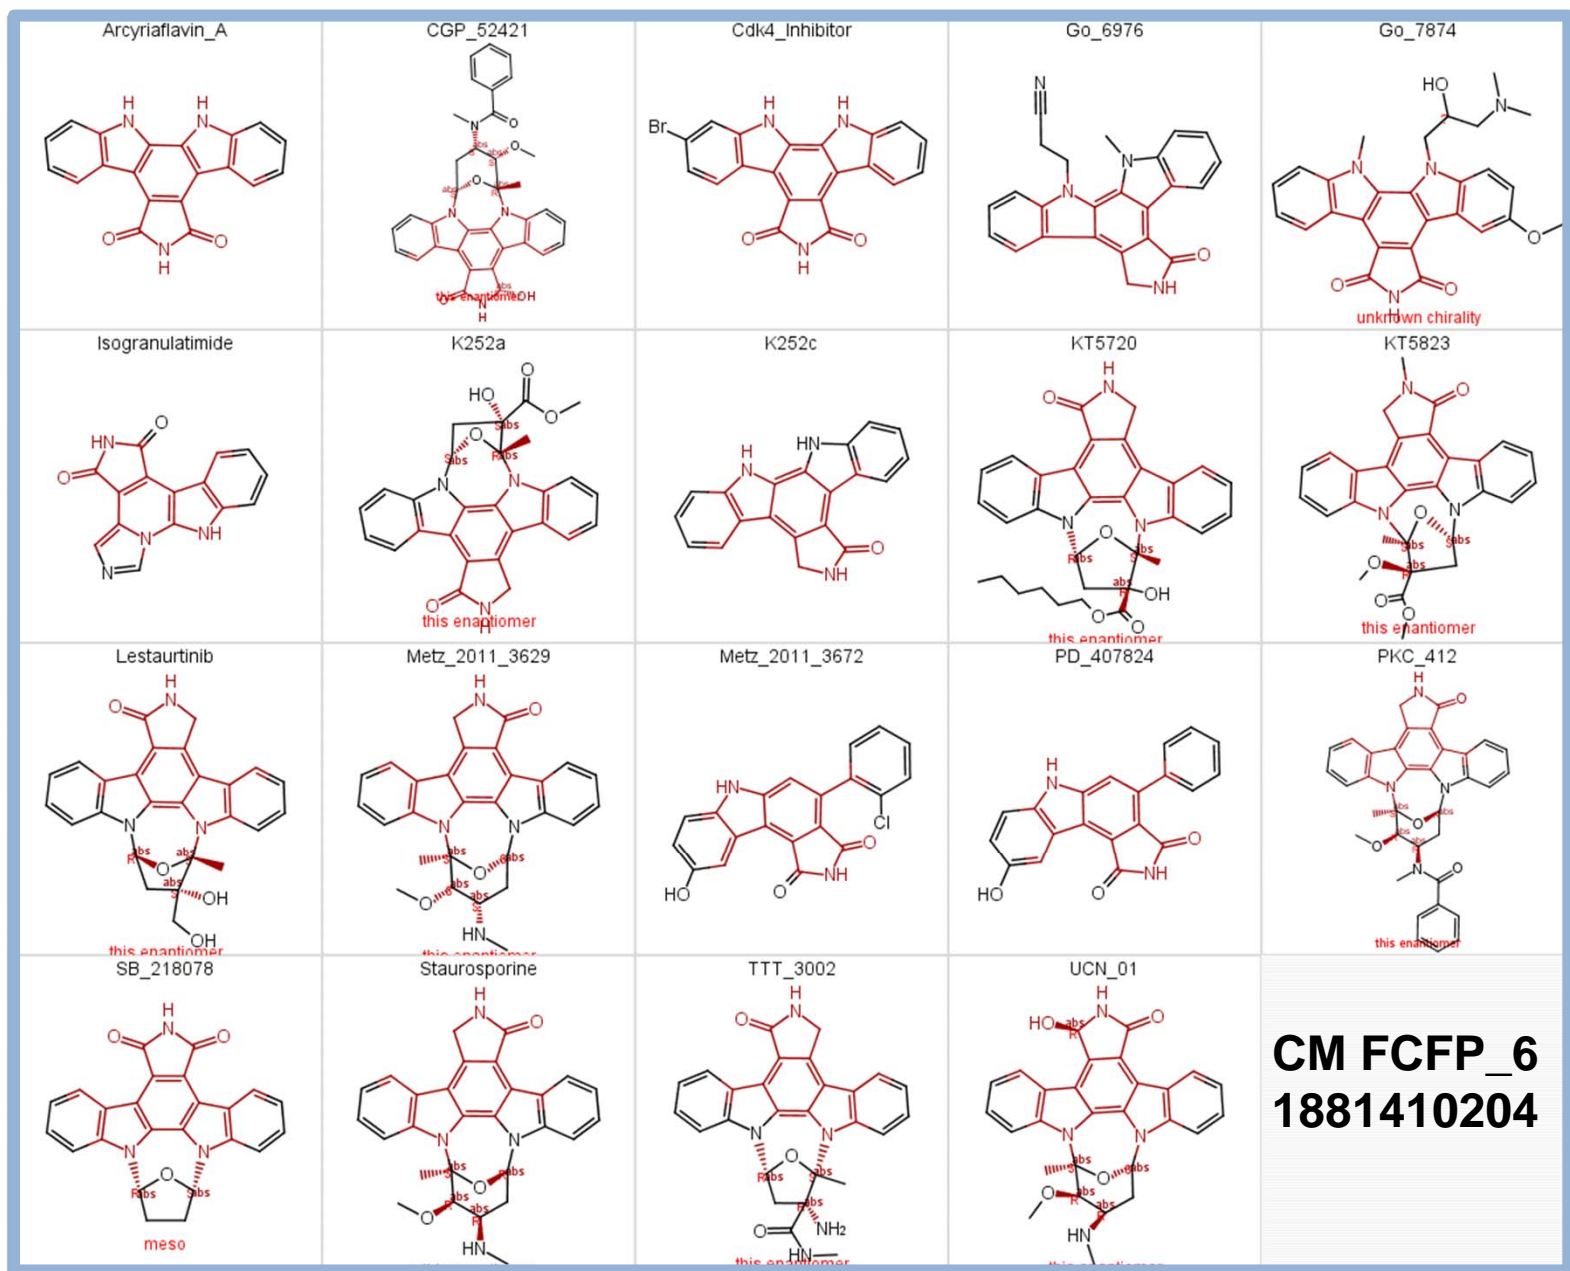

Figure S16. Examples of compounds retrieved using the substructures showing the highest correlation to affinity. The boxes colors correspond to the chemical classes.

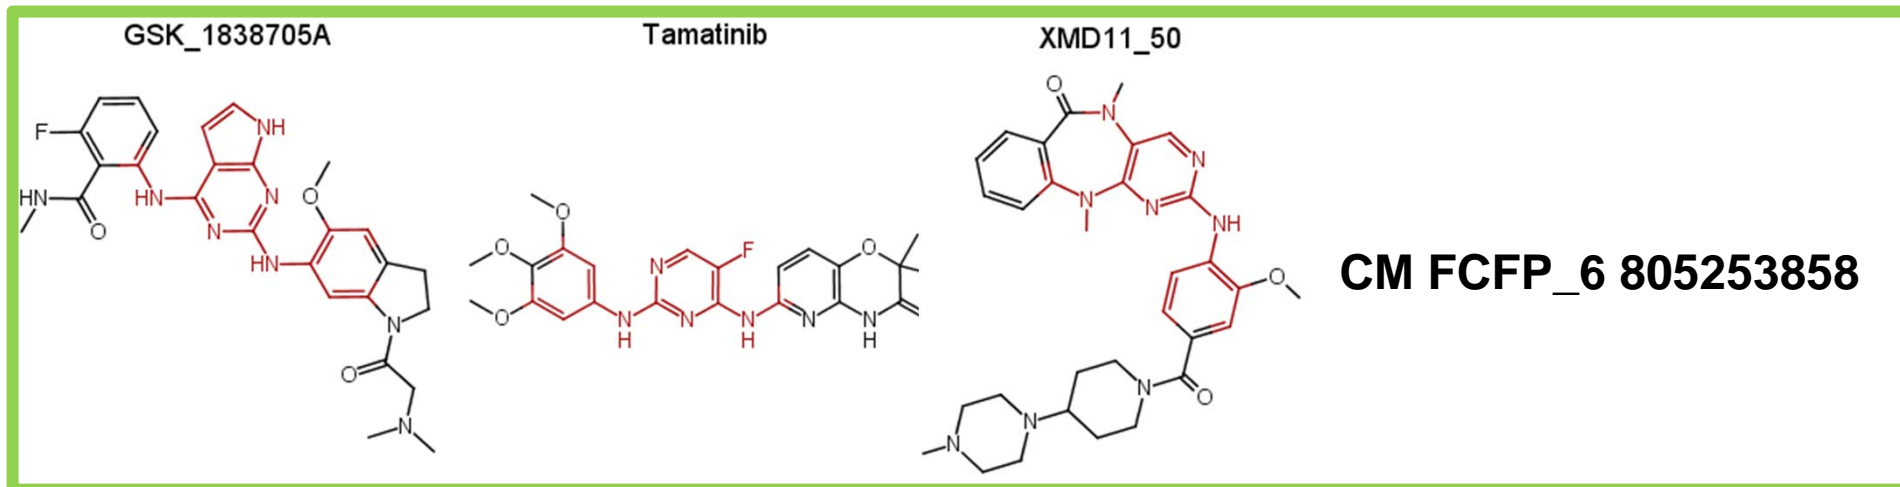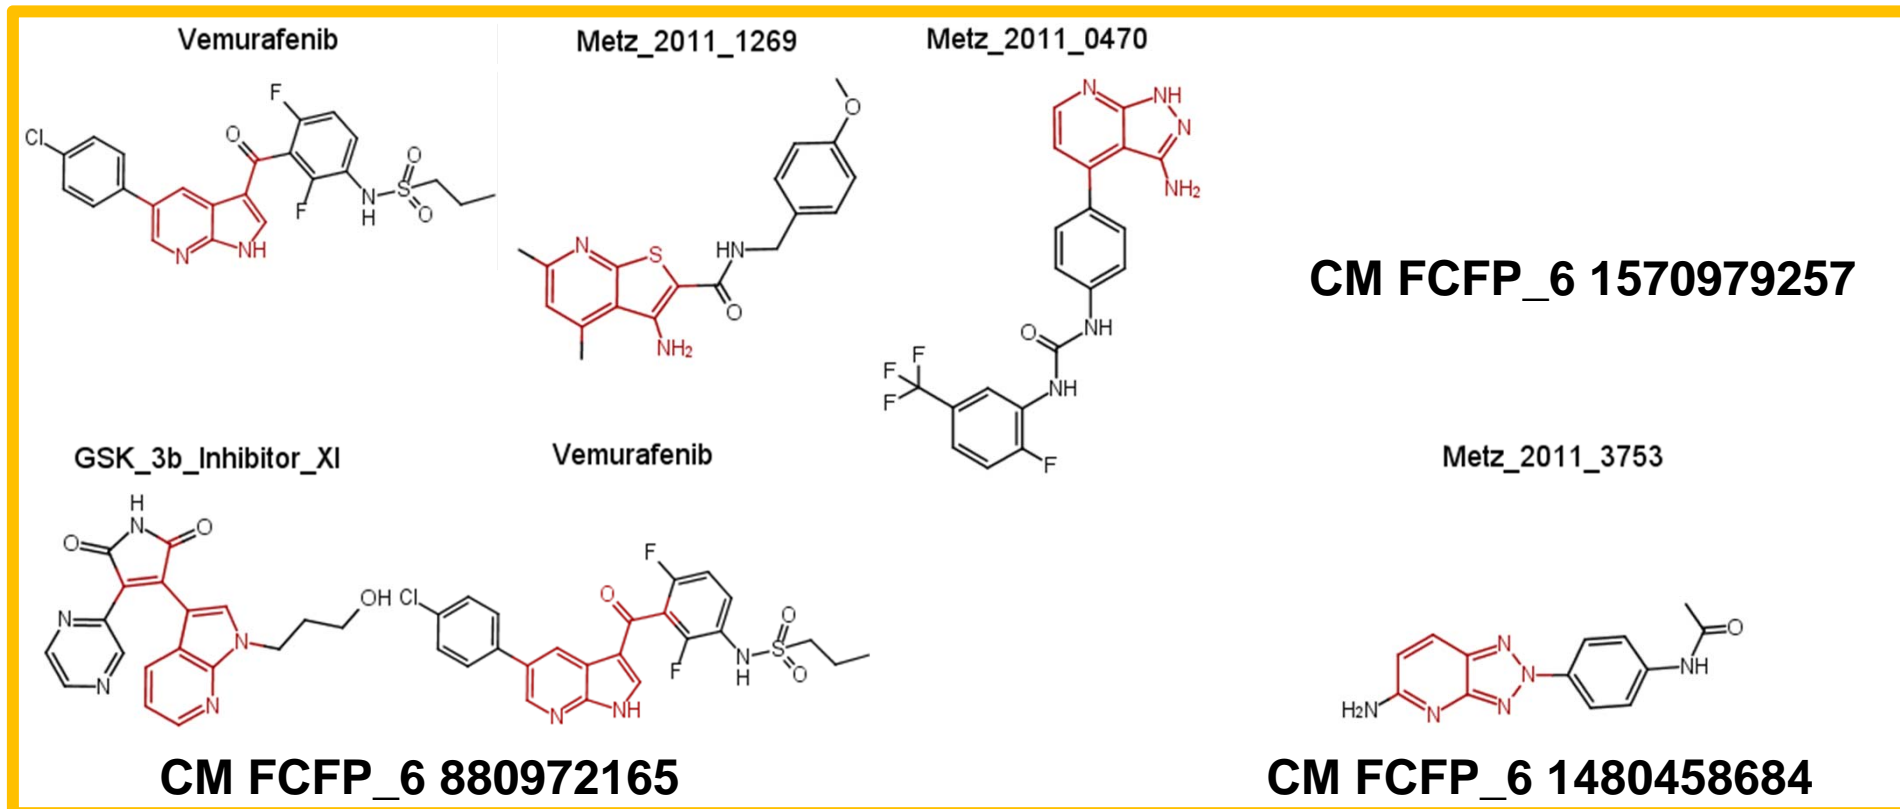

Figure S16. Examples of compounds retrieved using the substructures showing the highest correlation to affinity. The boxes colors correspond to the chemical classes.
